# Supplementary material
Source: publisher figshare collection journal article supplement (https://gsapubs.figshare.com/articles/dataset/_/12534953)

GSA Data Repository Item 2017148

Carmichael, S.K., Doctor, D.H., Wilson, C.G., Feierstein, J., and McAleer, R.J., 2017, New insight into the origin of manganese oxide ore deposits in the Appalachian Valley and Ridge of northeastern Tennessee and northern Virginia, USA: GSA Bulletin, doi:10.1130/B31682.1.

## **DATA REPOSITORY TABLES**

DR File 1: sample data

DR File 2: SEM data

EDS data for Mtn City Window Appendix

USGS\_EDS APPENDIX\_FINAL

DR File 3: wholerockgeochem

DR File 4.

Figure DR1

for PCA analysis -wt%

| Sample      | Location                                                                          | Lat (°N)    | Long (°W)    | Host Rock       | Hand Sample Description                                                                                                                                                        | Analysis method                                                             | Confirmed Mineralogy                                                          |
|-------------|-----------------------------------------------------------------------------------|-------------|--------------|-----------------|--------------------------------------------------------------------------------------------------------------------------------------------------------------------------------|-----------------------------------------------------------------------------|-------------------------------------------------------------------------------|
| JC-Clay1    | Mountain City Window - Mining Town Road                                           | 36.42706898 | -81.83638655 | Shady Dolomite  | white and red laminated clay                                                                                                                                                   | field ID only                                                               |                                                                               |
| JC-Clay2    | Mountain City Window - Gate Hollow Road                                           | 36.4268052  | -81.83558678 | Shady Dolomite  | contains ore float in Shady Dolomite clay residuum - red clay with Mn oxide, jasperoid float                                                                                   | field ID only                                                               |                                                                               |
| JC-4A       | Mountain City Window - TN Rt. 167, Radford Quarry, Butler, TN                     | 36.38675424 | -81.96293365 | Erwin Formation | sugary quartzite with Fe oxide following bedding planes                                                                                                                        | powder XRD                                                                  | goethite, hisingerite, schallerite(?)                                         |
| JC-4B       | Mountain City Window - TN Rt. 167, Radford Quarry, Butler, TN                     | 36.38682167 | -81.96285121 | Erwin Formation | Fe oxides following bedding planes in sugary quartzite associated with vein of chlorite                                                                                        | powder XRD, TEM-EDS                                                         | goethite, hisingerite                                                         |
| JC-4C       | Mountain City Window - TN Rt. 167, Radford Quarry, Butler, TN                     | 36.38675424 | -81.96293365 | Erwin Formation | sugary quartzite with Fe oxide following bedding planes                                                                                                                        | powder XRD, SEM-EDS, TEM-EDS                                                | goethite, hisingerite                                                         |
| JC-5        | Mountain City Window - TN Rt. 167, Butler Stone and Gravel Quarry, Butler, TN     | 36.41718298 | -81.83736739 | Erwin Formation | sugary quartzite with fewer Fe oxide veins than JC-4 samples, taken from top of quarry, Fe oxide vein does not follow strike/dip                                               | field ID only                                                               |                                                                               |
| AM-01       | Mountain City Window - US Rt. 421, Shouns prospect                                | 36.33934201 | -81.53323949 | Rome Formation  | botryoidal nodule growing in clay                                                                                                                                              | powder XRD, whole rock geochemistry                                         | romanechite, Ba-rich orthoclase                                               |
| DR150124-A1 | Mountain City Window - US Rt. 421, parking lot across street from Shouns prospect | 36.439477   | -81.795763   | Rome Formation  | fracture fill from jasperoid breccia matrix                                                                                                                                    | SEM-EDS, whole rock geochemistry                                            | cryptomelane-hollandite solid solution; minor quartz, feldspar, and muscovite |
| DR150124-A2 | Mountain City Window - US Rt. 421, parking lot across street from Shouns prospect | 36.439134   | -81.796171   | Rome Formation  | chert clast and rock fragments from jasperoid breccia                                                                                                                          | SEM-EDS, whole rock geochemistry                                            | quartz, minor feldspar and mica (SEM-EDS)                                     |
| DR150124-B  | Mountain City Window - US Rt. 421, Shouns prospect                                | 36.439477   | -81.795763   | Rome Formation  | botryoidal nodule growing in clay, flat "platy" appearance                                                                                                                     | whole rock geochemistry                                                     | romanechite, K-feldspar                                                       |
| JC-7A       | Mountain City Window - US Rt. 421, Shouns prospect                                | 36.33934201 | -81.53323949 | Rome Formation  | jasperoid breccia pod - thick (5 mm diameter) Mn oxide dendrites in breccia matrix voids                                                                                       | single crystal $\mu$ -XRD, TEM-EDS, TEM-ED, SEM-EDS                         | cryptomelane-hollandite solid solution                                        |
| JC-7A inset | Mountain City Window - US Rt. 421, Shouns prospect                                | 36.33934201 | -81.53323949 | Rome Formation  | jasperoid breccia pod - interior "pellet" of Mn oxide came out of geode lined with quartz crystals upon cutting. Numerous similar pellets within geodes in single hand sample. | powder XRD, TEM-EDS, TEM-ED, SEM-EDS                                        | cryptomelane-hollandite solid solution                                        |
| JC-7B       | Mountain City Window - US Rt. 421, Shouns prospect                                | 36.33934201 | -81.53323949 | Rome Formation  | botryoidal nodule growing in clay                                                                                                                                              | powder XRD, single crystal $\mu$ -XRD, TEM-EDS, TEM-ED, SEM-EDS, whole rock | romanechite, Ba-rich orthoclase                                               |
| JC-7C       | Mountain City Window - US Rt. 421, Shouns prospect                                | 36.33934201 | -81.53323949 | Rome Formation  | Mn oxide shrub in jasperoid breccia matrix void                                                                                                                                | powder XRD, single crystal $\mu$ -XRD, TEM-EDS, TEM-ED, SEM-EDS, whole rock | cryptomelane-hollandite solid solution, goethite                              |
| JC-7D       | Mountain City Window - US Rt. 421, Shouns prospect                                | 36.33934201 | -81.53323949 | Rome Formation  | wrinkled 5 mm thick sheet of Mn oxide filling in joints and bedding planes                                                                                                     | powder XRD, single crystal $\mu$ -XRD, TEM-EDS, TEM-ED, SEM-EDS             | cryptomelane-hollandite solid solution                                        |
| JC-7E       | Mountain City Window - US Rt. 421, Shouns prospect                                | 36.33934201 | -81.53323949 | Rome Formation  | wrinkled sheets of Mn oxide filling in joints and bedding planes                                                                                                               | field ID only                                                               |                                                                               |
| JC-7F       | Mountain City Window - US Rt. 421, Shouns prospect                                | 36.33934201 | -81.53323949 | Rome Formation  | dendrites and coatings from red shale, N of jasperoid pod                                                                                                                      | field ID only                                                               |                                                                               |
| JC-7G       | Mountain City Window - US Rt. 421, Shouns prospect                                | 36.33934201 | -81.53323949 | Rome Formation  | jasperoid breccia pod - thick (5 mm diameter) Mn oxide dendrites in breccia matrix voids                                                                                       | SEM-EDS                                                                     | cryptomelane-hollandite solid solution                                        |
| JC-7H       | Mountain City Window - US Rt. 421, Shouns prospect                                | 36.34569973 | -81.48430567 | Rome Formation  | jasperoid breccia pod - porous Fe-oxide filaments                                                                                                                              | powder XRD, TEM-EDS, TEM-ED, SEM-EDS, FIB-EM                                | goethite                                                                      |
| JC-8A       | Mountain City Window - Mining Town Road                                           | 36.34569974 | -81.48430568 | Shady Dolomite  | clay matrix, crumbly, brown/yellow with lots of jasperoid, brecciated goethite (some Mn?) in clasts.                                                                           | field ID only                                                               |                                                                               |
| JC-8B       | Mountain City Window - Mining Town Road                                           | 36.34569974 | -81.48430568 | Shady Dolomite  | clay matrix, crumbly, brown/yellow with lots of jasperoid, brecciated goethite (some Mn?) in clasts.                                                                           | field ID only                                                               |                                                                               |
| JC-9A       | Mountain City Window - Mining Town Road                                           | 36.37294963 | -81.7464023  | Shady Dolomite  | bedded claystone, mudstone with laminated Fe-rich ore                                                                                                                          | field ID only                                                               |                                                                               |
| JC-9B       | Mountain City Window - Mining Town Road                                           | 36.37294963 | -81.7464023  | Shady Dolomite  | bedded claystone, mudstone with laminated Fe-rich ore; darker samples                                                                                                          | field ID only                                                               |                                                                               |
| JC-10A      | Mountain City Window - Mining Town Road (on private property)                     | 36.42254518 | -81.82409458 | Shady Dolomite  | anticline containing substantial Fe oxide ore, mix of laminations and "frothy" textures, some Cu green staining on frothy area                                                 | powder XRD, whole rock geochemistry                                         | goethite                                                                      |
| JC-10B      | Mountain City Window - Mining Town Road (on private property)                     | 36.42254518 | -81.82409458 | Shady Dolomite  | anticline containing substantial Fe oxide ore, mix of laminations and "frothy" textures, some Cu green staining on frothy area                                                 | field ID only                                                               |                                                                               |

|            |                                                                               |             |              |                                                            |                                                                                                                                                                                                                                                                                                               |                                                     |                                                                                |
|------------|-------------------------------------------------------------------------------|-------------|--------------|------------------------------------------------------------|---------------------------------------------------------------------------------------------------------------------------------------------------------------------------------------------------------------------------------------------------------------------------------------------------------------|-----------------------------------------------------|--------------------------------------------------------------------------------|
| JC-10C     | Mountain City Window - Mining Town Road (on private property)                 | 36.42254518 | -81.82409458 | Shady Dolomite                                             | anticline containing substantial Fe oxide ore, mix of laminations and "frothy" textures, some Cu green staining on frothy area                                                                                                                                                                                | field ID only                                       |                                                                                |
| JC-10D     | Mountain City Window - Mining Town Road (on private property)                 | 36.42254518 | -81.82409458 | Shady Dolomite                                             | anticline containing substantial Fe oxide ore, mix of laminations and "frothy" textures, some Cu green staining on frothy area                                                                                                                                                                                | field ID only                                       |                                                                                |
| JC-10E     | Mountain City Window - Mining Town Road (on private property)                 | 36.42254518 | -81.82409458 | Shady Dolomite                                             | brecciated sample, Fe-rich, many reaction rims                                                                                                                                                                                                                                                                | field ID only                                       |                                                                                |
| JC-11A     | Mountain City Window - Mining Town Road                                       | 36.42706898 | -81.83638655 | Shady Dolomite                                             | breccia with matrix of Fe and Mn oxides, in appearance to sample SH-2                                                                                                                                                                                                                                         | field ID only                                       |                                                                                |
| JC-12      | Mountain City Window - Mining Town Road                                       | 36.426967   | -81.840133   | Shady Dolomite                                             | Mn nodules on side of road in ditch, form dendrites (macro scale ~ 10 cm dendrite pattern), embedded in clay.                                                                                                                                                                                                 | field ID only                                       |                                                                                |
| JC-13      | Mountain City Window - Gate Hollow Road                                       | 36.4268052  | -81.83558678 | Shady Dolomite                                             | jasperoid breccia sample - unaltered Shady outcrop next to brecciated jasperoid and some Mn, Fe oxide ore blocks.                                                                                                                                                                                             | field ID only                                       |                                                                                |
| JC-14      | Mountain City Window - Gate Hollow Road                                       | 36.4268052  | -81.83558678 | Shady Dolomite                                             | ore float in Shady Dolomite residuum - red clay with Mn oxide, jasperoid float                                                                                                                                                                                                                                | field ID only                                       |                                                                                |
| JC-15A     | Mountain City Window - Mine Ridge Road                                        | 36.42611918 | -81.8333998  | Shady Dolomite                                             | breccia sample: mix of bulk nodules on jasperoid, breccia matrix ore. Mostly Mn (no yellow or red staining), only black and brown rock/clay. White cherty areas in contact with jasperoid, both chert and jasperoid are associated with Mn oxidation.                                                         | field ID only                                       |                                                                                |
| JC-15B     | Mountain City Window - Mine Ridge Road                                        | 36.42611918 | -81.8333998  | Shady Dolomite                                             | large nodule on curved jasperoid: mix of bulk nodules on jasperoid, breccia matrix ore. Mostly Mn (no yellow or red staining), only black and brown rock/clay. White cherty areas in contact with jasperoid, both chert and jasperoid are associated with Mn oxidation.                                       | field ID only                                       |                                                                                |
| JC-15C     | Mountain City Window - Mine Ridge Road                                        | 36.42611918 | -81.8333998  | Shady Dolomite                                             | euohedral quartz crystals with Mn oxides (appears to be part of geode): mix of bulk nodules on jasperoid, breccia matrix ore. Mostly Mn (no yellow or red staining), only black and brown rock/clay. White cherty areas in contact with jasperoid, both chert and jasperoid are associated with Mn oxidation. | field ID only                                       |                                                                                |
| SH-1       | Mountain City Window - Ruritan Club ditch - TN Rt. 133, Shady Valley, TN      | 36.52895    | -81.909042   | Erwin Formation                                            | thin dendrites (1 mm diameter), form complex anastomizing network along quartzite samples surfaces                                                                                                                                                                                                            | single crystal $\mu$ -XRD, TEM-EDS, TEM-ED, SEM-EDS | hollandite-cryptomelane series                                                 |
| SH-2       | Mountain City Window - TN Rt. 167, Butler Stone and Gravel Quarry, Butler, TN | 36.384012°  | -81.946124°  | Erwin Formation                                            | Mn oxide forms breccia matrix in quartzite                                                                                                                                                                                                                                                                    | powder XRD, SEM-EDS, whole rock geochemistry        | romanechite, goethite                                                          |
| DRBYC-646  | Shenandoah Valley - Va. Rt. 638, Howellsville Road (on private property)      | 39.019281°  | -78.024100°  | Antietam Formation                                         | quartzite breccia matrix, well-formed crystals of cryptomelane/hollandite solid solution form cement between quartzite breccia clasts                                                                                                                                                                         | SEM-EDS, whole rock geochemistry                    | cryptomelane-hollandite solid solution                                         |
| K130618-A  | Shenandoah Valley - Va. Rt. 638, Howellsville Road (on private property)      | 39.019281°  | -78.024100°  | Antietam Formation                                         | Well-formed crystals form cement between quartzite breccia clasts. Botryoidal fracture coating.                                                                                                                                                                                                               | powder XRD, whole rock geochemistry                 | cryptomelane-hollandite solid solution                                         |
| K130618-B  | Shenandoah Valley - Va. Rt. 638, Howellsville Road (on private property)      | 39.019281°  | -78.024100°  | Antietam Formation                                         | Well-formed crystals form cement between quartzite breccia clasts. Botryoidal fracture coating.                                                                                                                                                                                                               | SEM-EDS, powder XRD, whole rock geochemistry        | cryptomelane-hollandite solid solution                                         |
| K130618-C  | Shenandoah Valley - quarry at Howellsville Road and Heavens Tree Trail        | 38.995568°  | -78.058470°  | Antietam Formation                                         | Mn oxide forms breccia matrix in quartzite                                                                                                                                                                                                                                                                    | whole rock geochemistry                             | cryptomelane-hollandite solid solution                                         |
| K130712-A  | Shenandoah Valley - Stanley Mine                                              | 38.559980°  | -78.510960°  | Antietam Formation, near contact with Waynesboro Formation | nodules of Mn-oxide formed in clay, float on surface of landfill and quarry site                                                                                                                                                                                                                              | SEM-EDS, powder XRD, whole rock geochemistry        | multi-phase MnO (cryptomelane, lithiophorite, other?), feldspar, quartz, micas |
| K130712-B  | Shenandoah Valley - Stanley Mine                                              | 38.559980°  | -78.510960°  | Antietam Formation, near contact with Waynesboro Formation | nodules of Mn-oxide formed in clay, float on surface of landfill and quarry site                                                                                                                                                                                                                              | SEM-EDS, whole rock geochemistry                    | multi-phase MnO (cryptomelane, lithiophorite, other?), feldspar, quartz, micas |
| K130712-B2 | Shenandoah Valley - Stanley Mine                                              | 38.559980°  | -78.510960°  | Antietam Formation, near contact with Waynesboro Formation | nodules of Mn-oxide formed in clay, float on surface of landfill and quarry site                                                                                                                                                                                                                              | SEM-EDS, whole rock geochemistry                    | multi-phase MnO (cryptomelane, lithiophorite, other?), feldspar, quartz, micas |

|            |                                                                                                                                                                                                |            |             |                                                                                       |                                                                                          |                                                 |                                                                                     |
|------------|------------------------------------------------------------------------------------------------------------------------------------------------------------------------------------------------|------------|-------------|---------------------------------------------------------------------------------------|------------------------------------------------------------------------------------------|-------------------------------------------------|-------------------------------------------------------------------------------------|
| K130712-C1 | Shenandoah Valley - Compton Mine<br>bedrock sample                                                                                                                                             | 38.769607° | -78.357938° | Tomstown<br>Dolomite/Waynesboro<br>Formation, near contact with<br>Antietam Formation | well-formed bluish-black crystals on fracture surface in<br>quartzite breccia            | whole rock geochemistry                         | cryptomelane-hollandite<br>solid solution (XRD)                                     |
| K130712-C2 | Shenandoah Valley - Compton Mine<br>bedrock sample                                                                                                                                             | 38.769607° | -78.357938° | Tomstown<br>Dolomite/Waynesboro<br>Formation, near contact with<br>Antietam Formation | well-formed crystals in black cement coating quartzite<br>breccia clasts                 | --                                              | cryptomelane-hollandite<br>solid solution                                           |
| DR150417-A | Shenandoah Valley - Lyndhurst mine<br>spoil pile, approximately .025 km south of<br>Inch Branch in George Washington and<br>Jefferson National Forest (Glenwood and<br>Pedlar Ranger District) | 38.012098° | -78.931256° | Antietam Formation                                                                    | quartzite breccia matrix, float from mine pit, with botryoidal<br>MnO surrounding clasts | SEM-EDS, powder XRD, whole<br>rock geochemistry | cryptomelane-hollandite<br>solid solution; minor quartz,<br>feldspar, and muscovite |
| DR150417-B | Shenandoah Valley - Lyndhurst mine<br>spoil pile, approximately .025 km south of<br>Inch Branch in George Washington and<br>Jefferson National Forest (Glenwood and<br>Pedlar Ranger District) | 38.012098° | -78.931256° | Antietam Formation                                                                    | quartzite breccia matrix, float from mine pit, with botryoidal<br>MnO surrounding clasts | SEM-EDS, powder XRD, whole<br>rock geochemistry | cryptomelane-hollandite<br>solid solution; minor quartz,<br>feldspar, and muscovite |

### **EDS data for Figures 7, 8, and 9 (Mountain City Window samples)**

All Mountain City Window SEM-EDS data were collected at Appalachian State University on a FEI Quanta 200 Environmental SEM with a Si-Li EDS detector, or at the Smithsonian National Museum of Natural History on a FEI Nova NanoSEM 600 SEM equipped with a ThermoFisher silicon drift EDS detector (SDD)

Samples were carbon coated and examined under high vacuum at an accelerating voltage of 20kV (FEI Quanta 200 ESEM) or 15kV (FEI Nova NanoSEM 600) and a working distance of ~10 mm (working distance for maximum collection efficiency on the EDS detectors).

Peak identification was done by the EDAX software. EDS analyses were used in a qualitative capacity for phase identification and to document major element variations (e.g. Mn vs. Fe) that resulted in observed brightness variations in manganese and iron oxide minerals in backscatter electron images.

Provided here is a subset of EDS analyses with annotation. We emphasize that these spectra were used in a qualitative capacity only. All sample mineralogy was confirmed via powder or single crystal X-ray diffraction.

Associated SEM-EDS data (Appalachian State University): Sample JC-7A (Fig 4D, 7C, 7D)

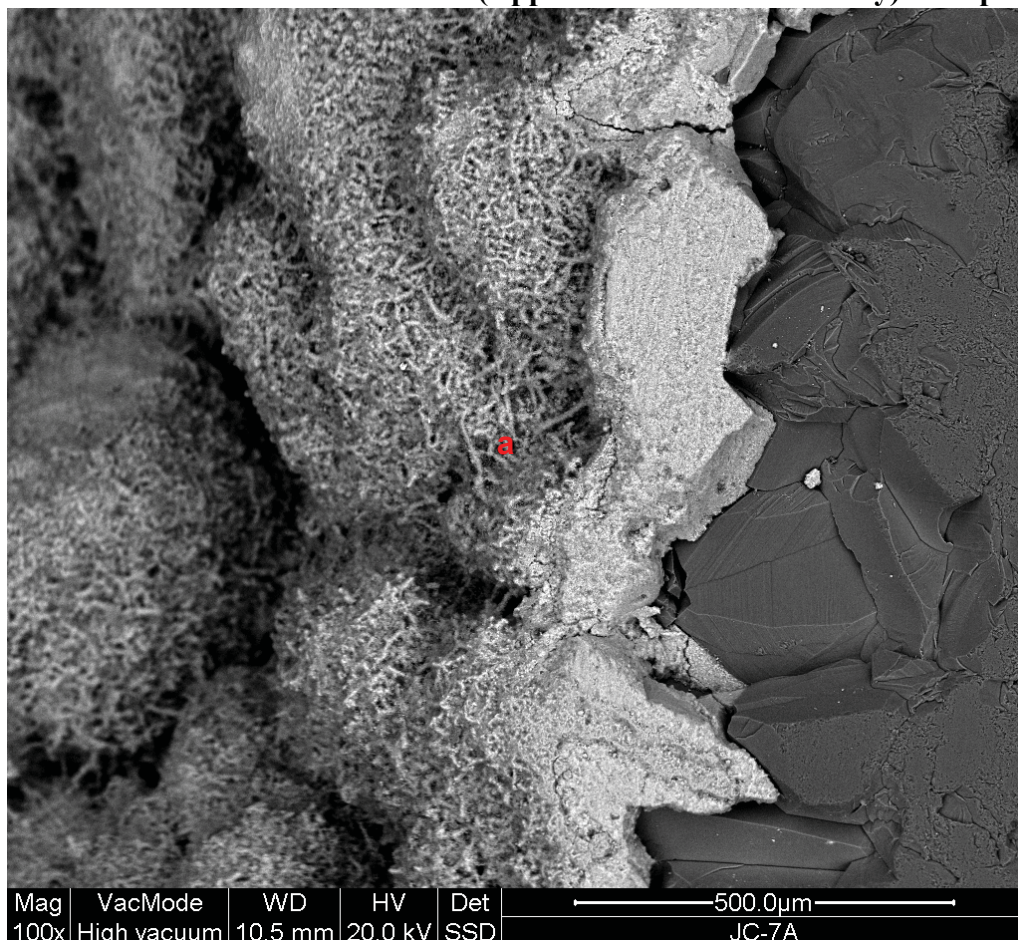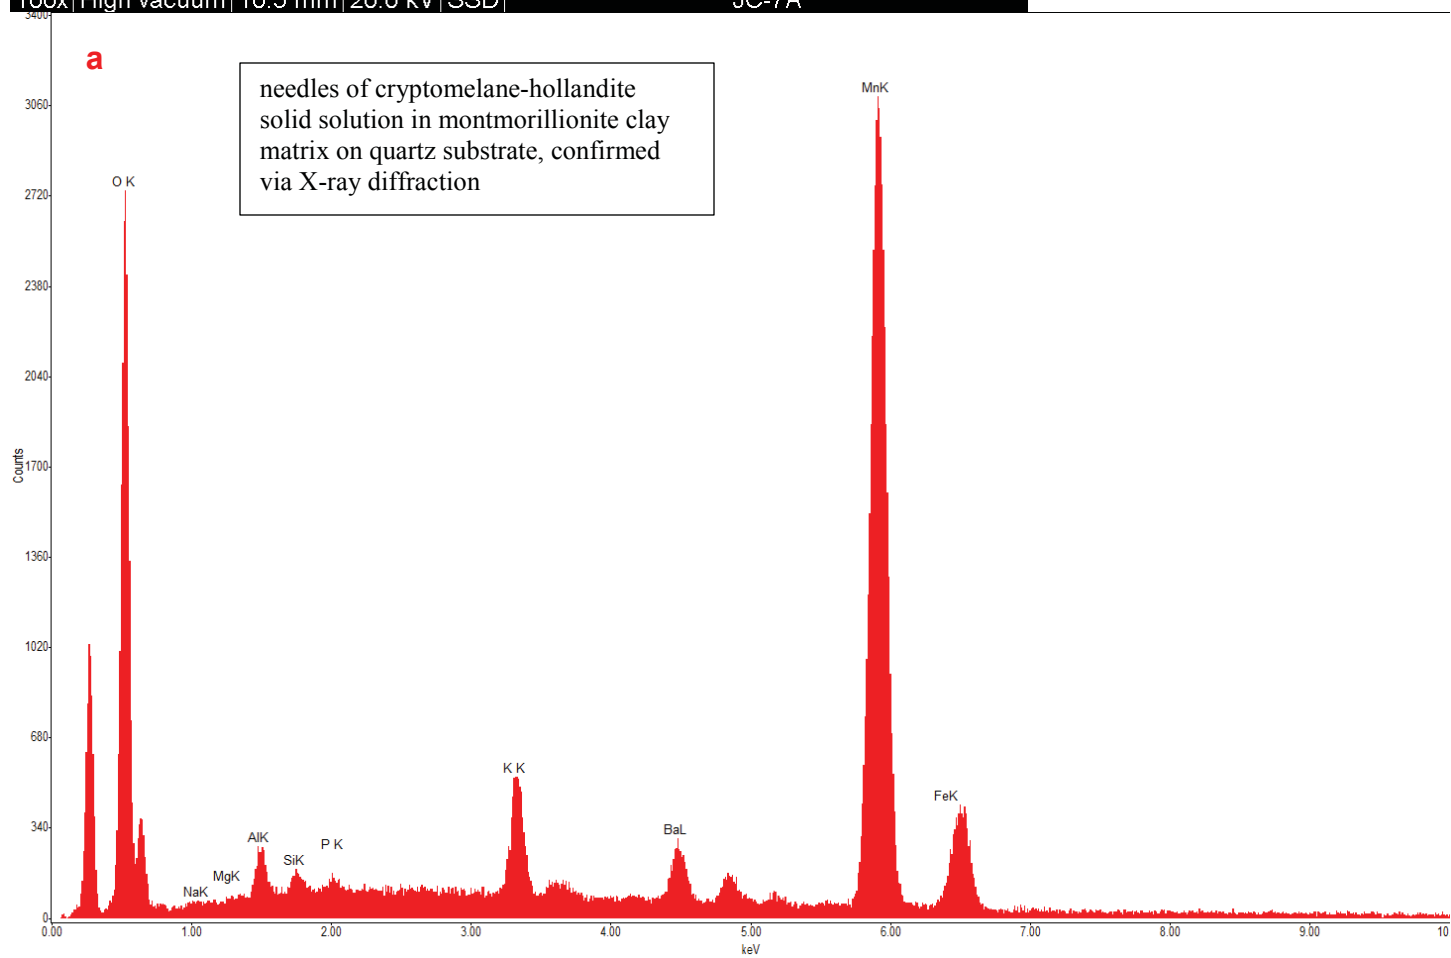



Associated SEM-EDS data (Appalachian State University): Sample JC-7B (Fig 4H, 9A, 9B)

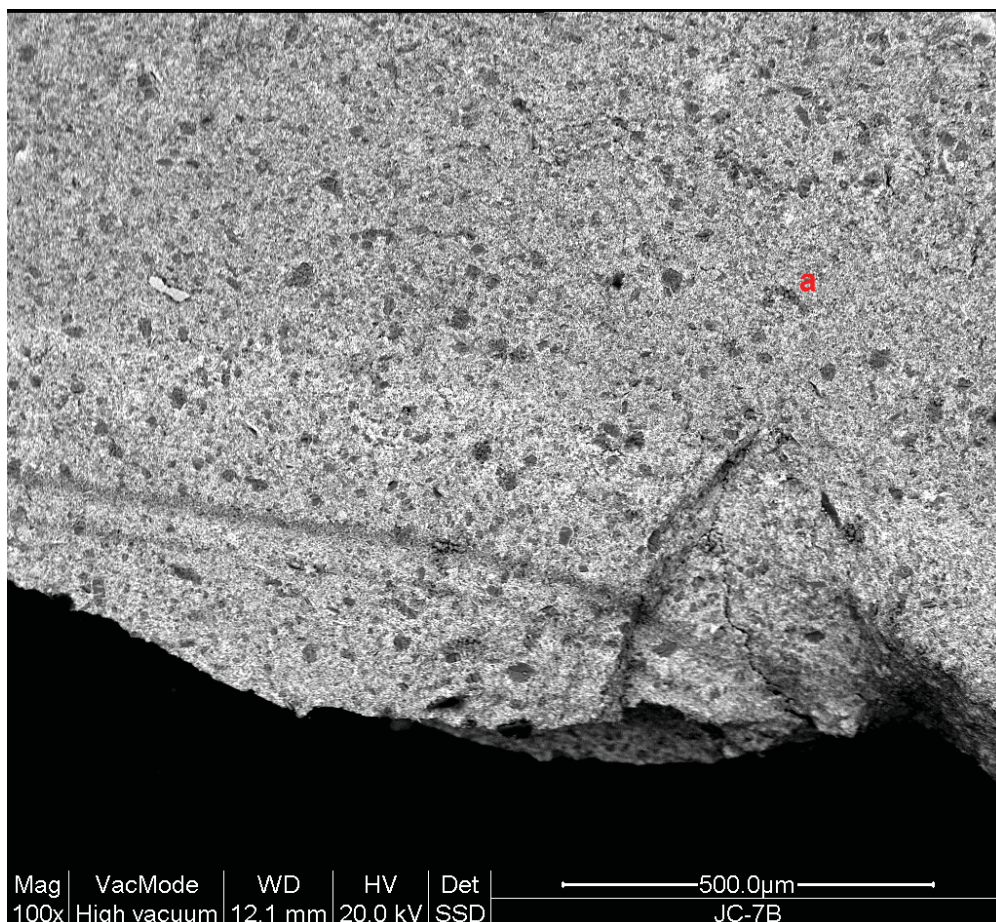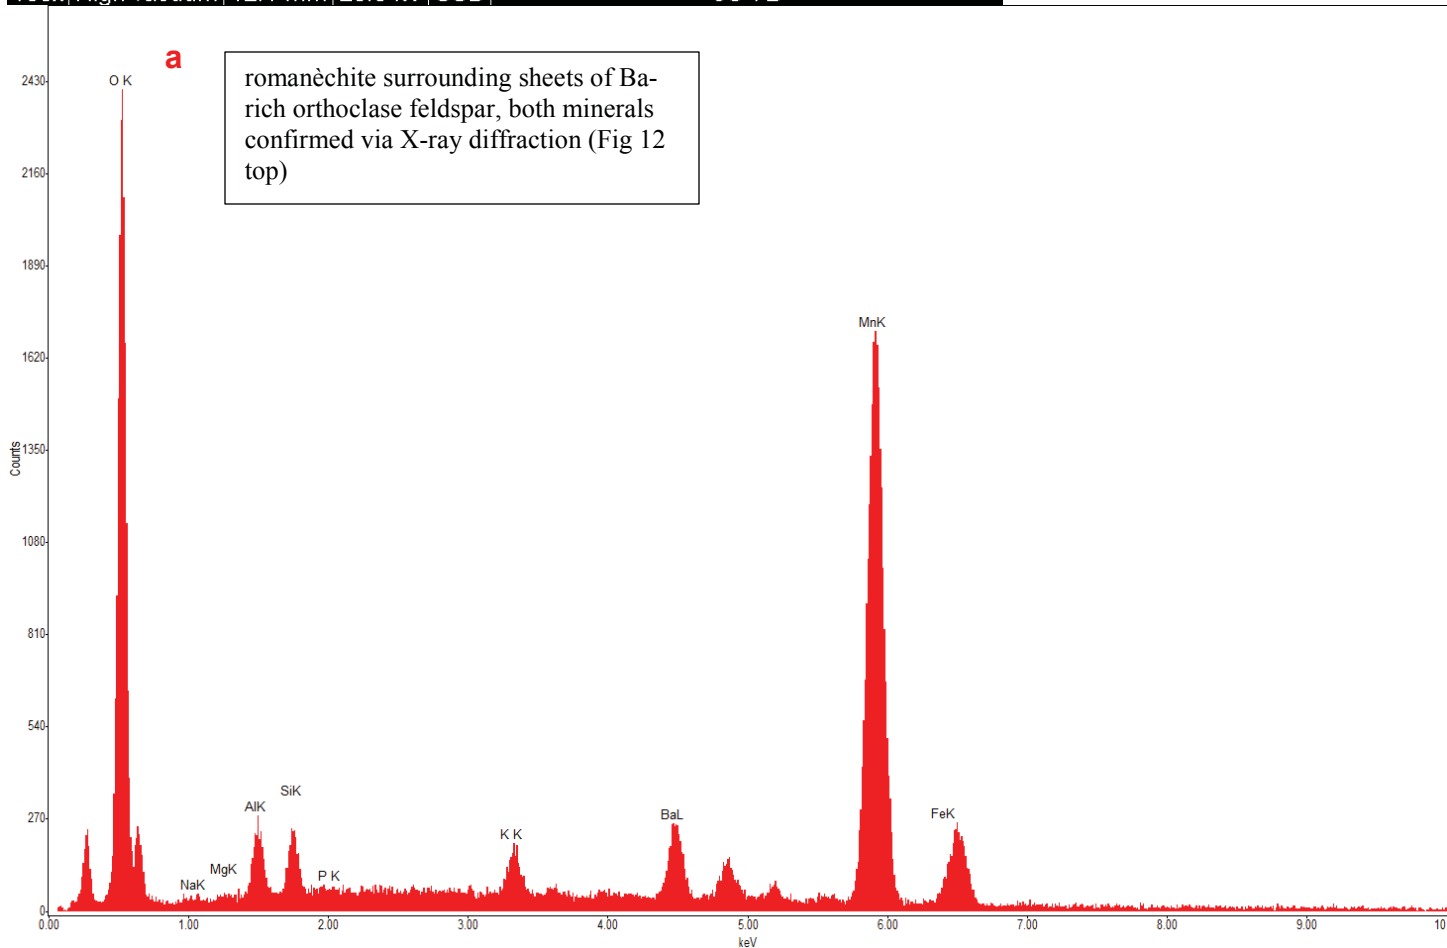

Associated SEM-EDS data (Smithsonian Mineral Sciences): Sample JC-7C (Fig 4G, 8A, 8B)

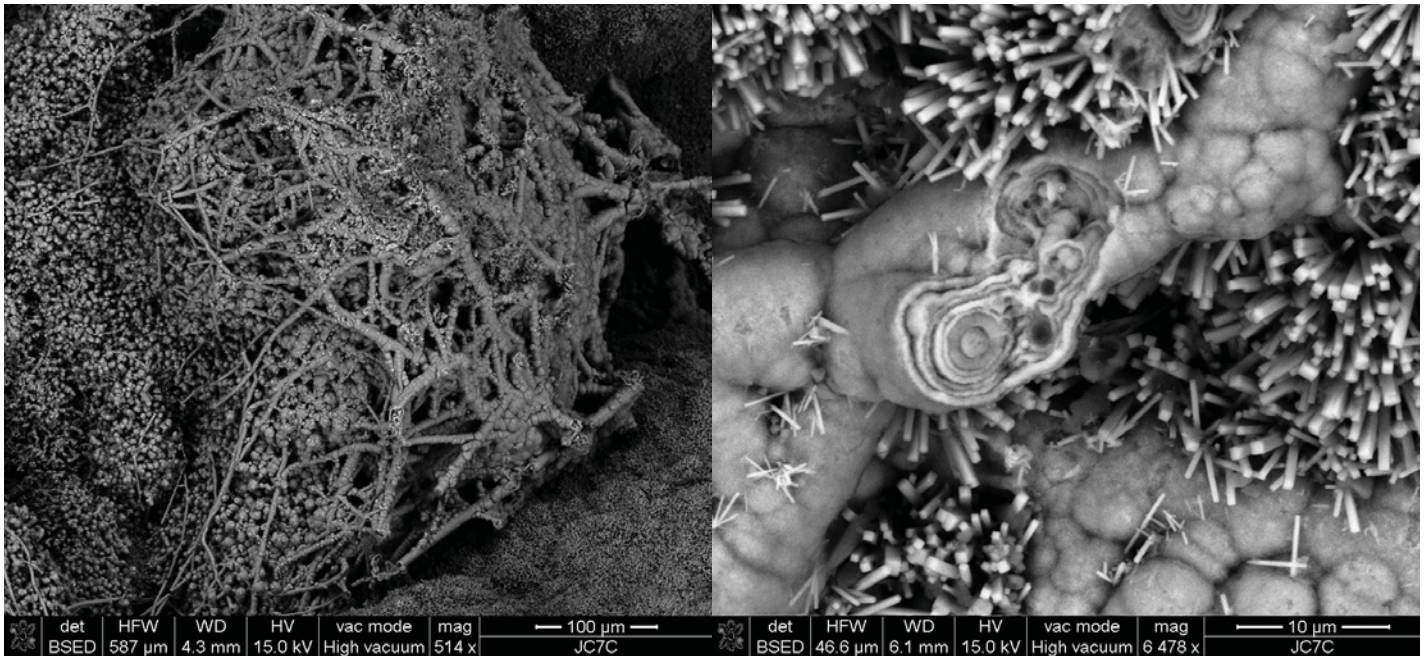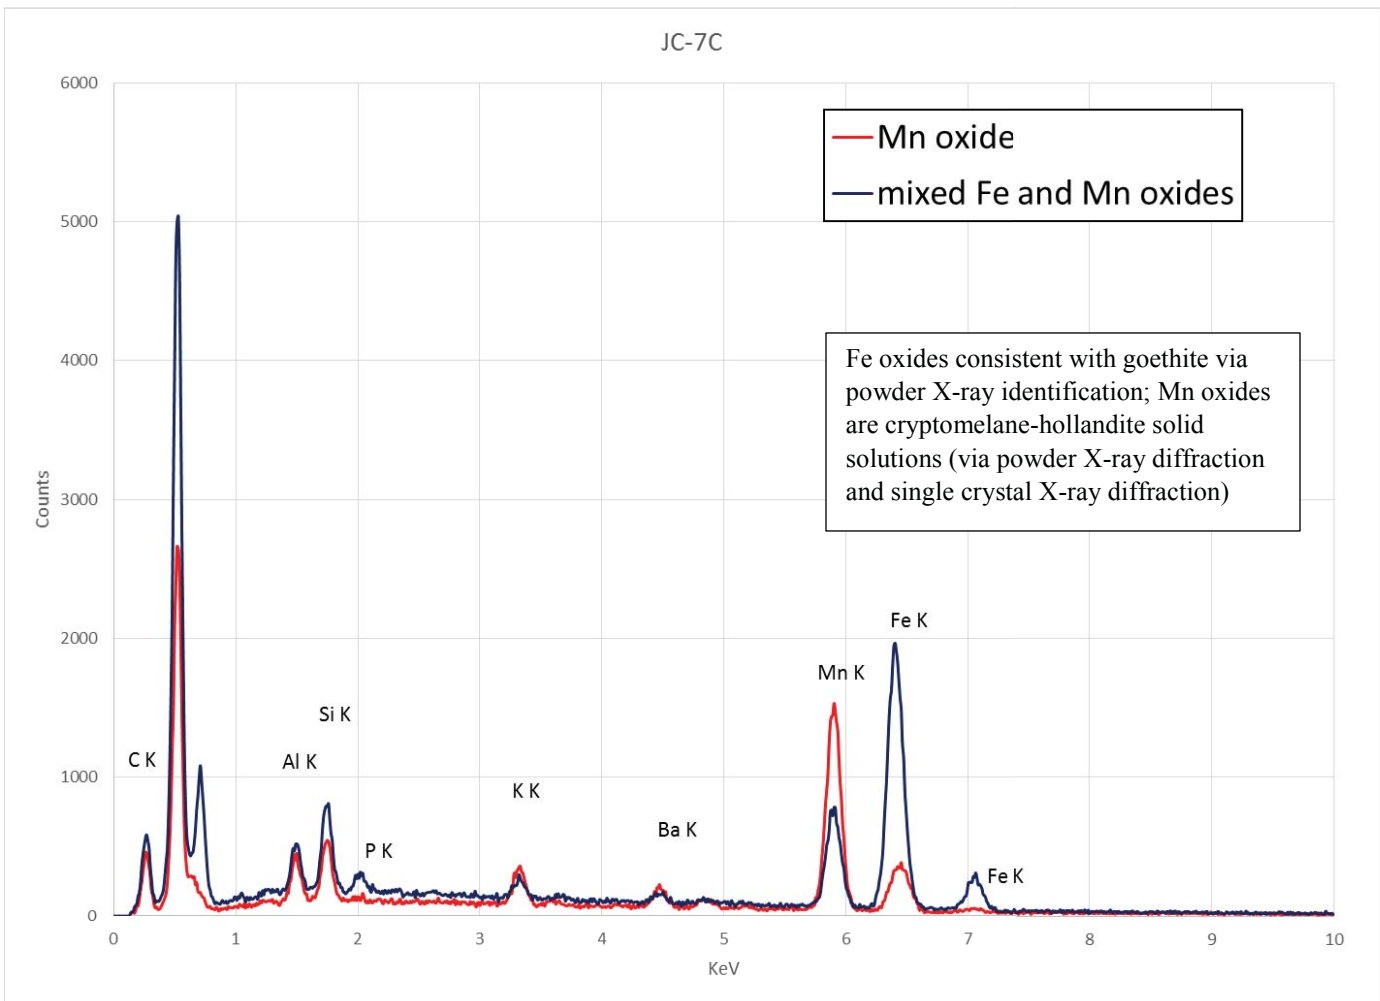



Associated SEM-EDS data (Appalachian State University): Sample JC-7D (Fig 4C, 7E, 7F)

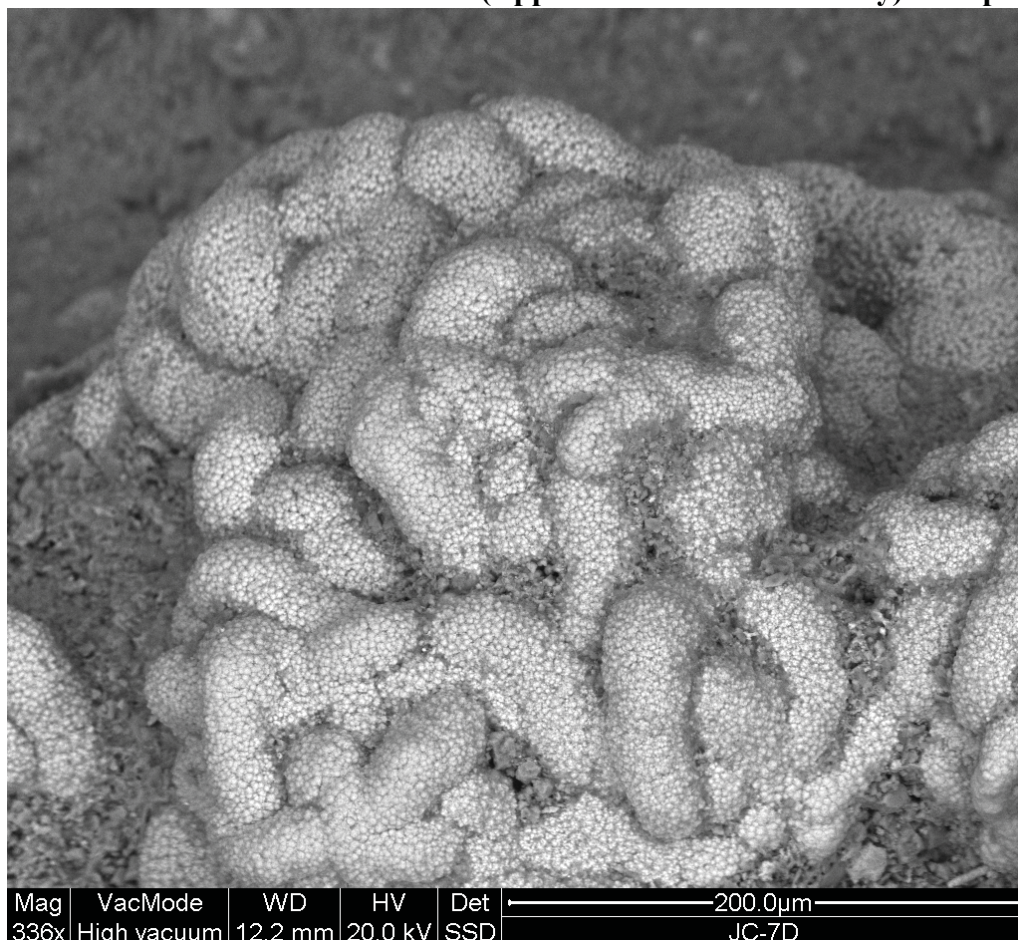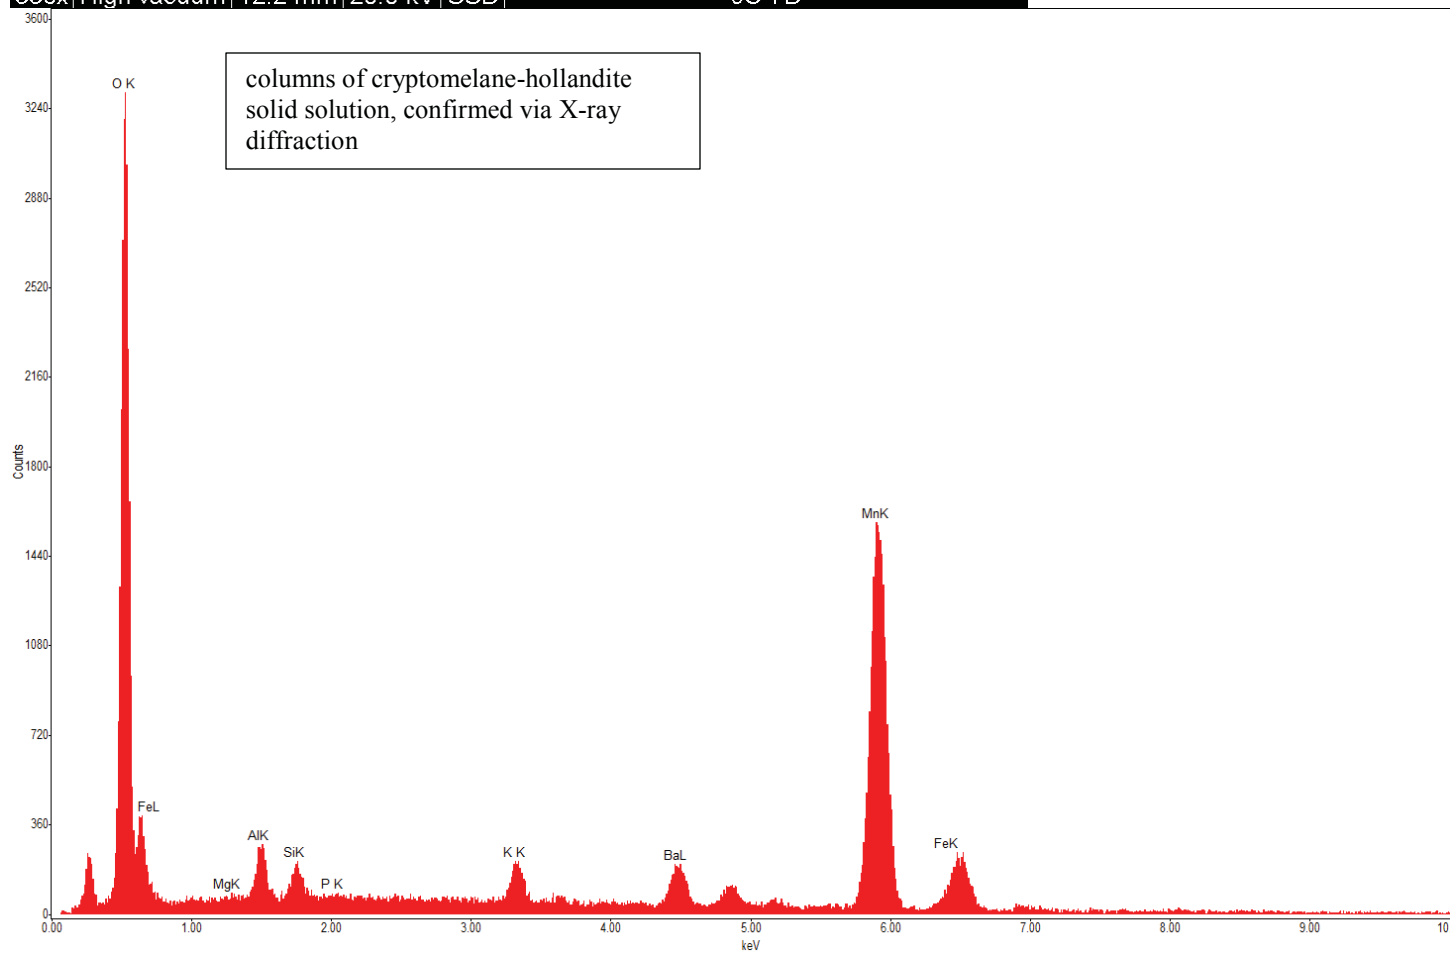

Associated SEM-EDS data (Appalachian State University): Sample JC-7D (Fig 4C, 7E, 7F)

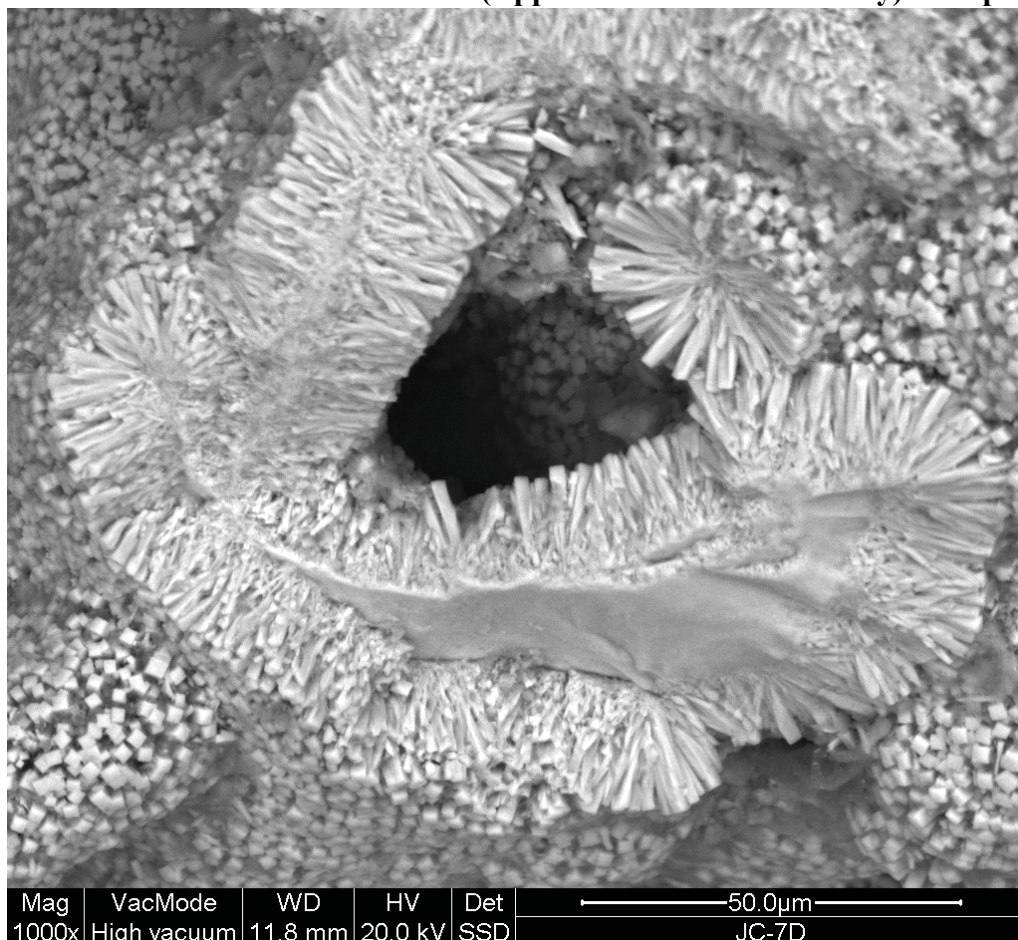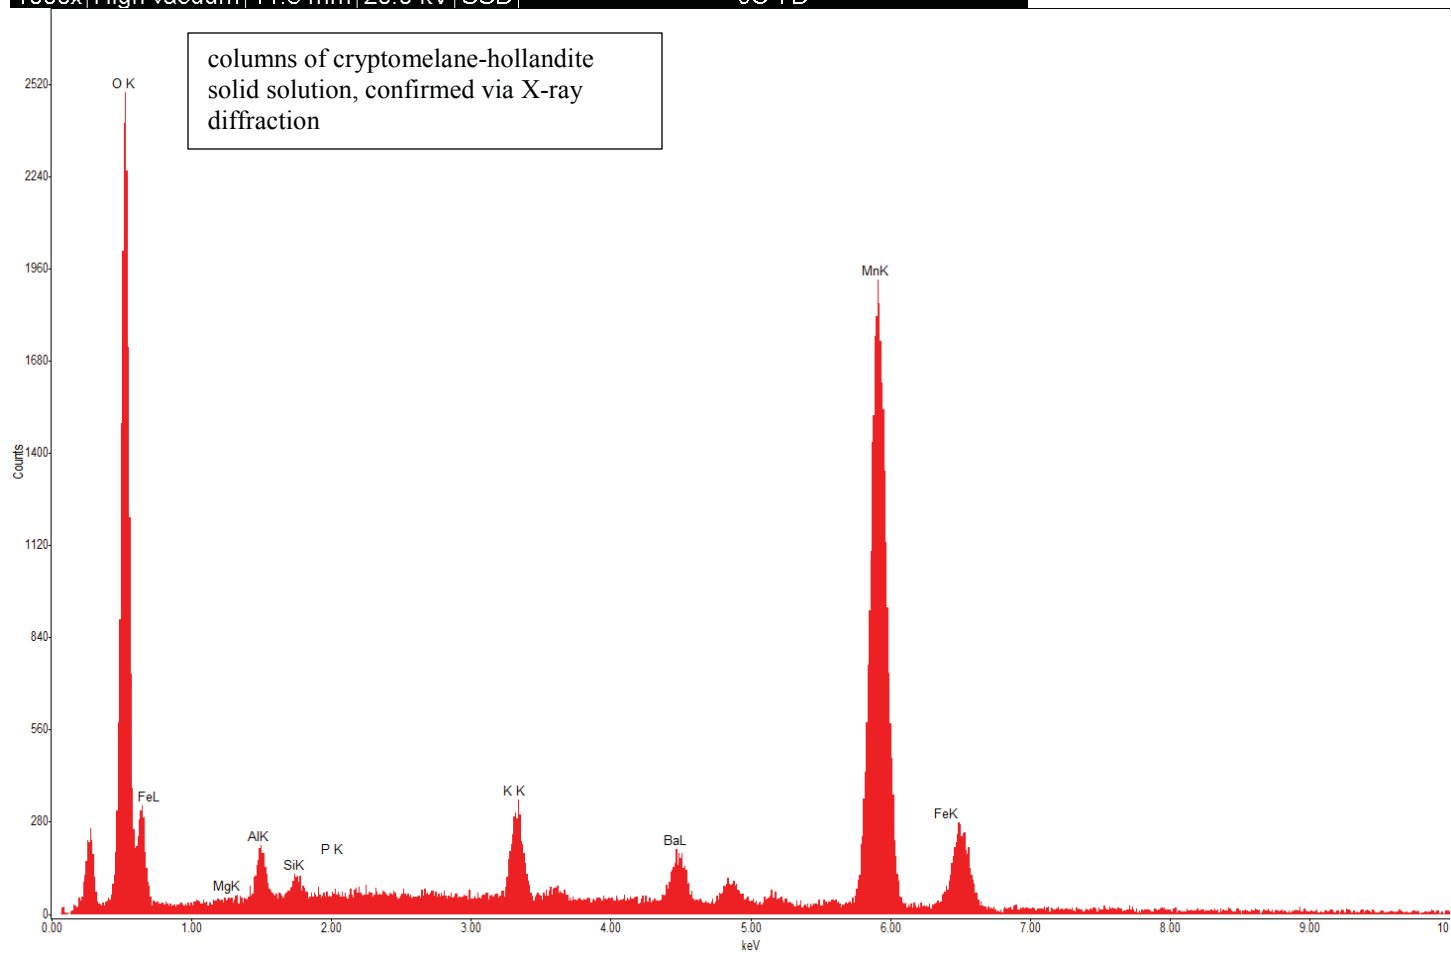



**Associated SEM-EDS data (Appalachian State University): Sample JC-7H (Fig 8C, 8D, 8E)**

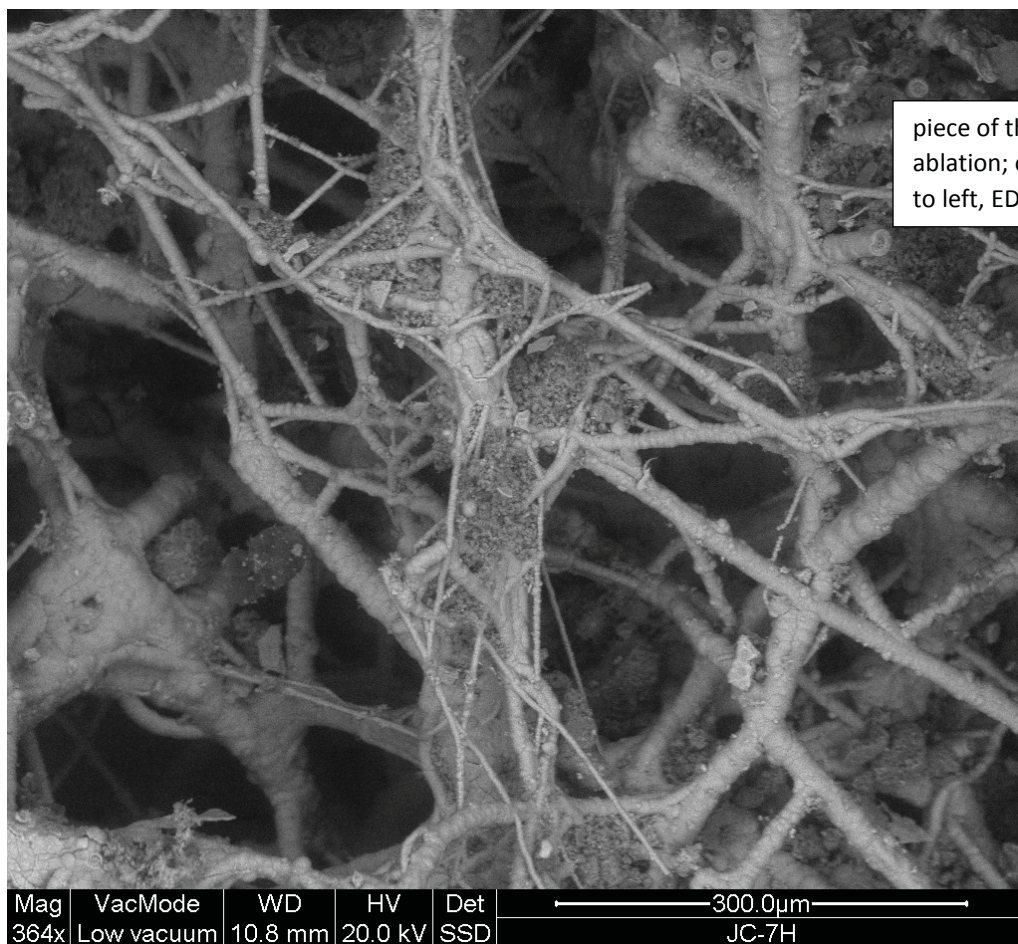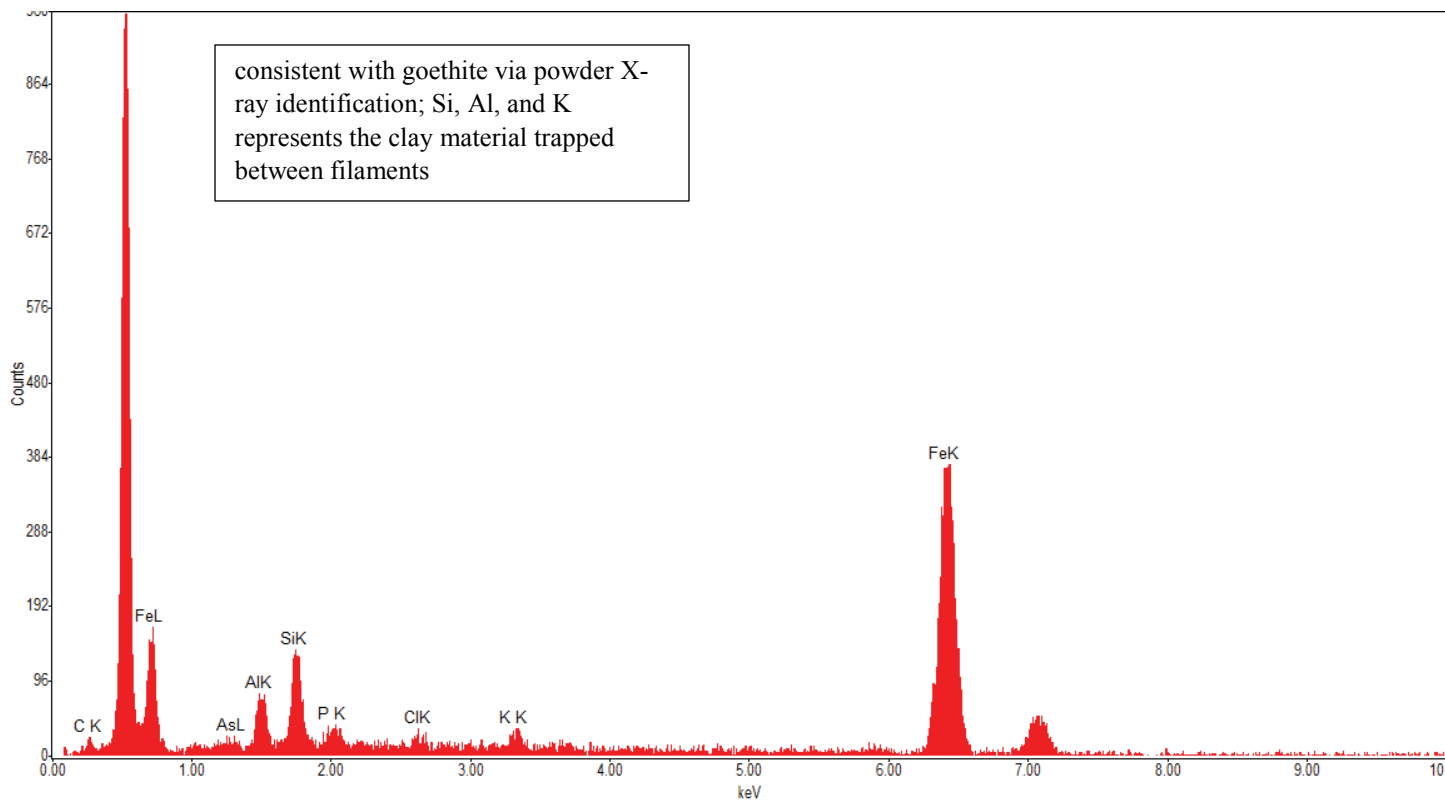

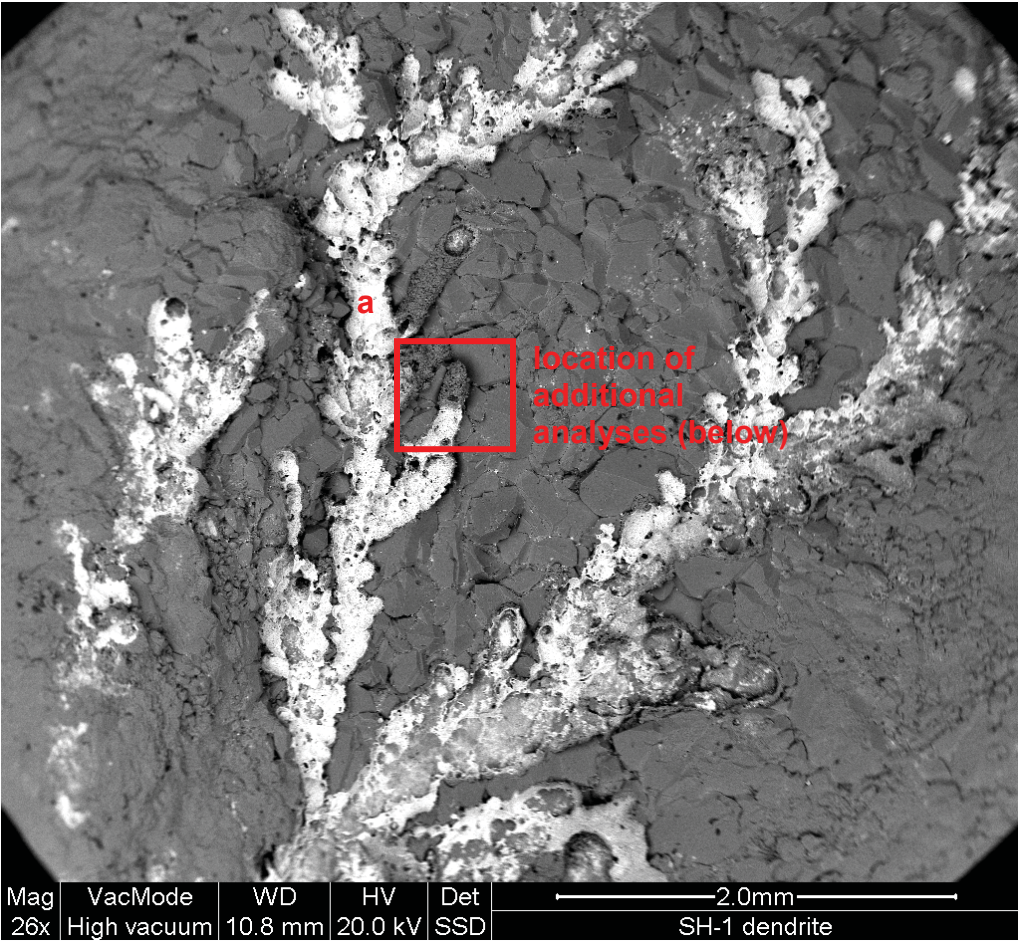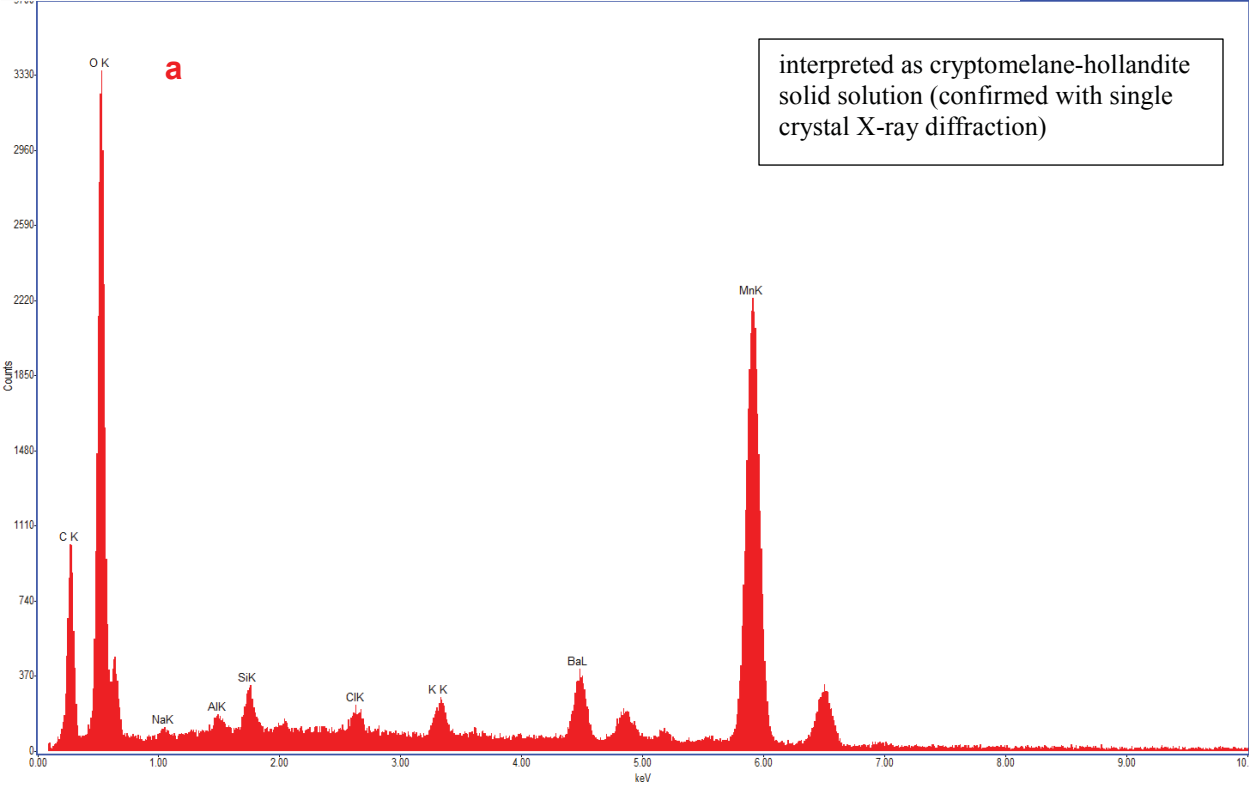



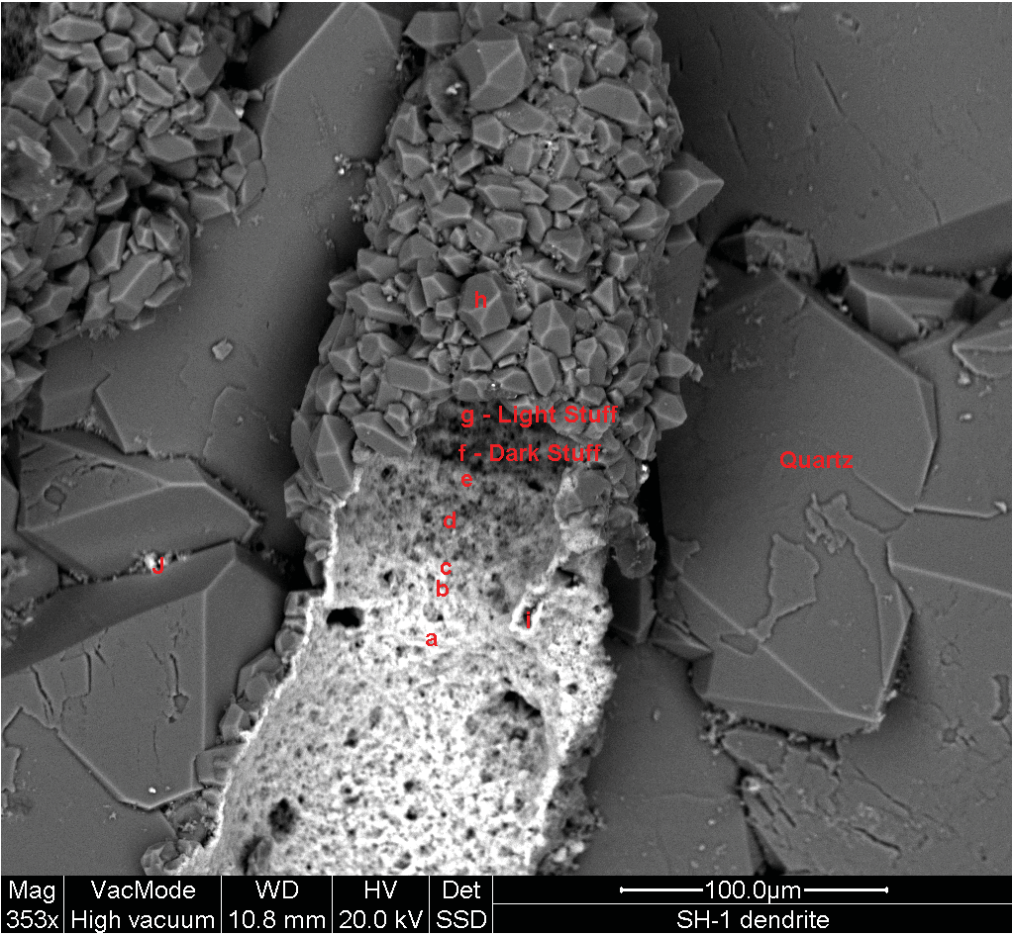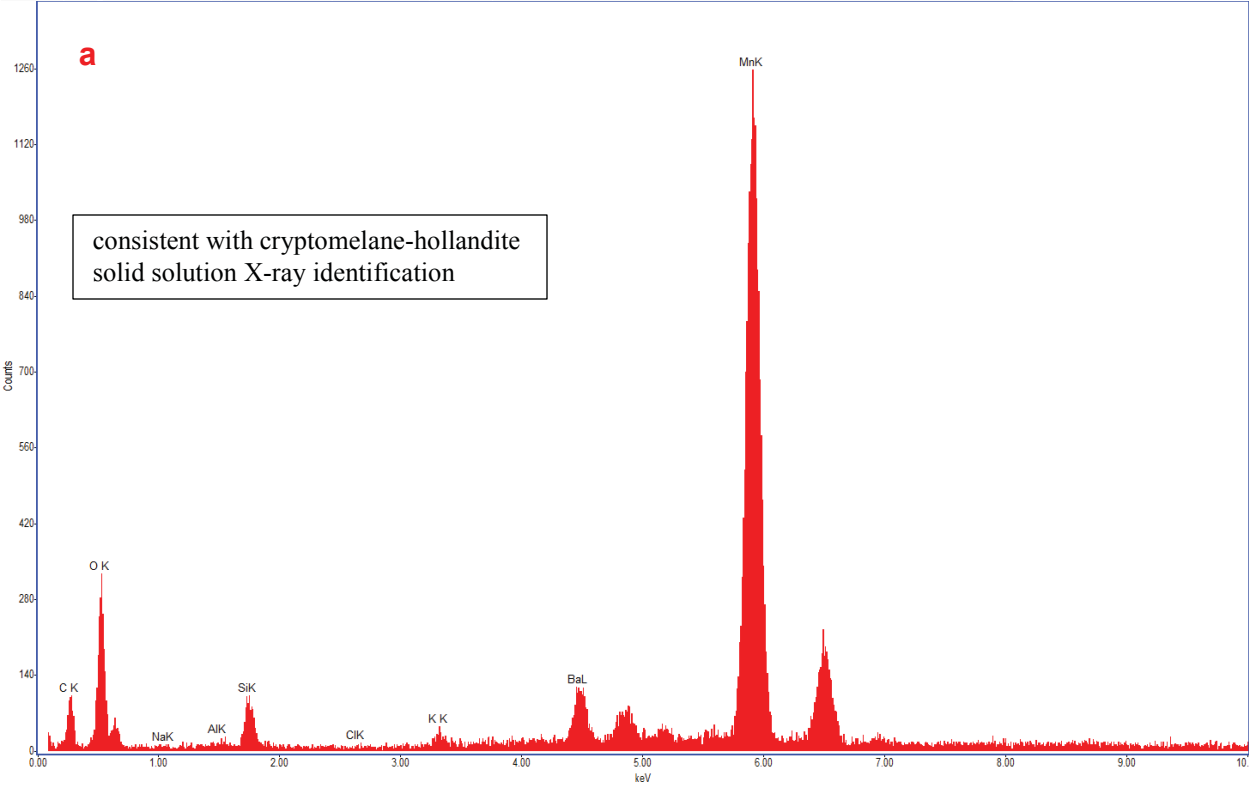



Associated SEM-EDS data (Appalachian State University): Sample SH-1 (Fig 5D, 7A, 7B)

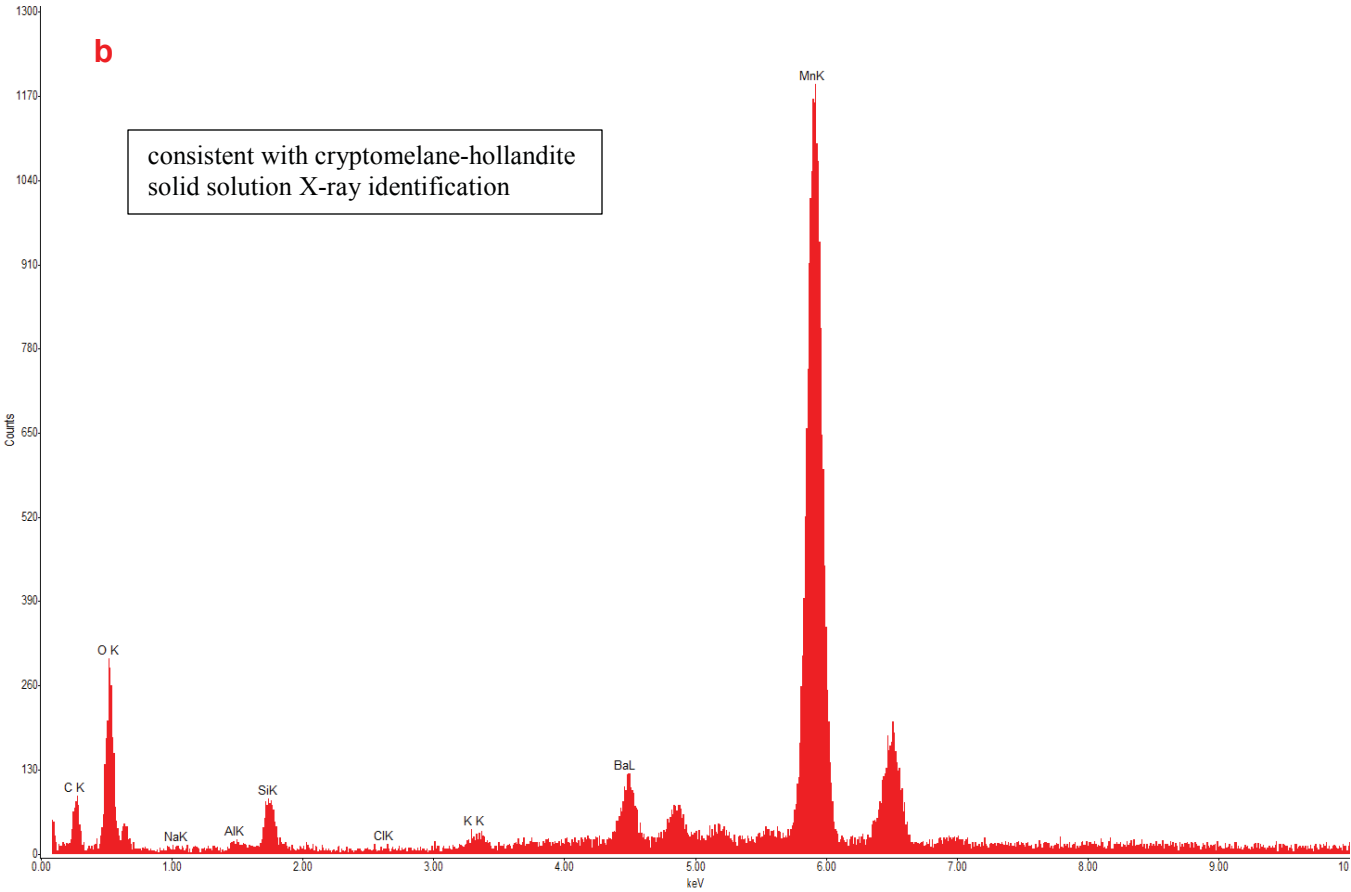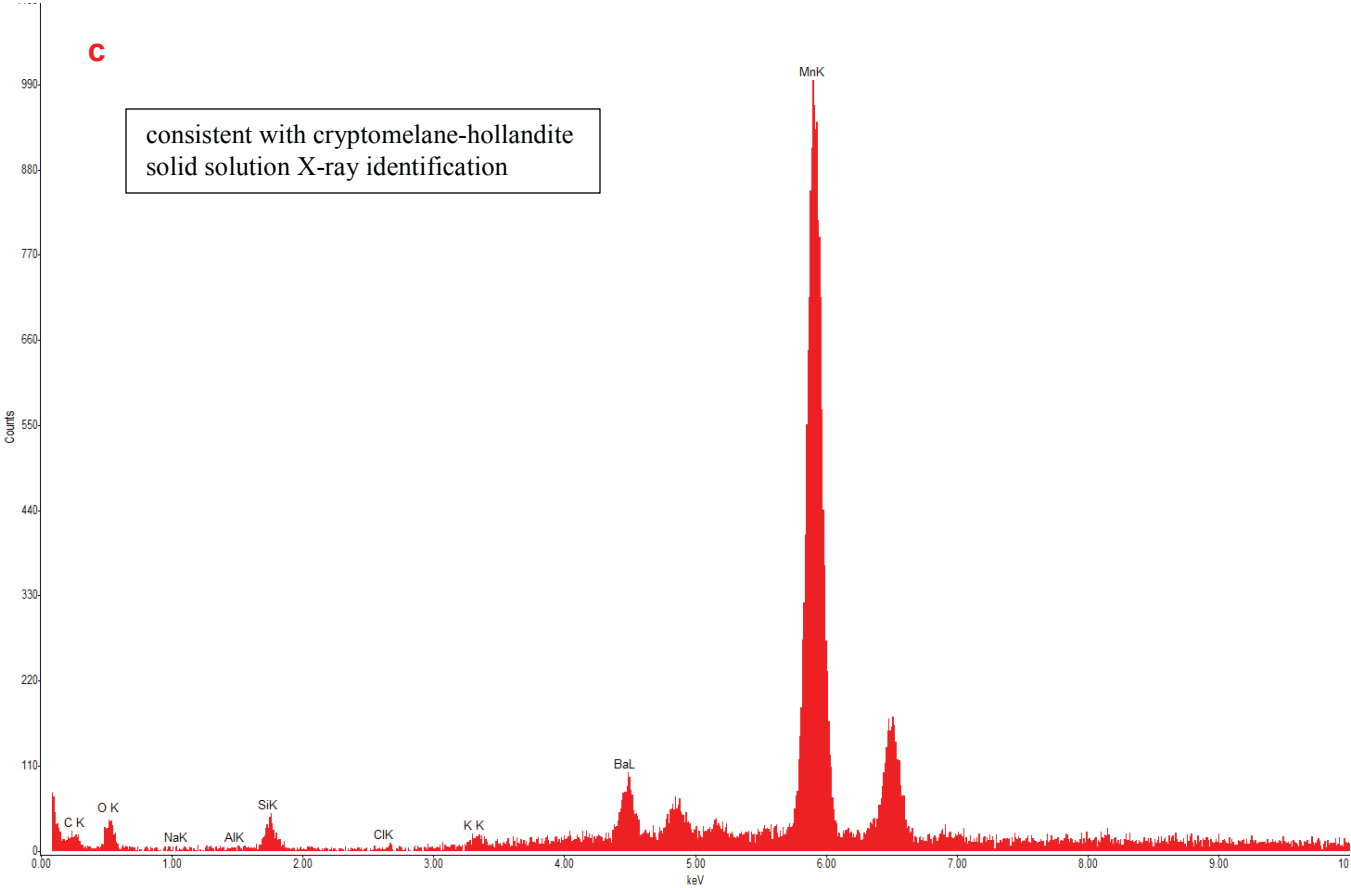

Associated SEM-EDS data (Appalachian State University): Sample SH-1 (Fig 5D, 7A, 7B)

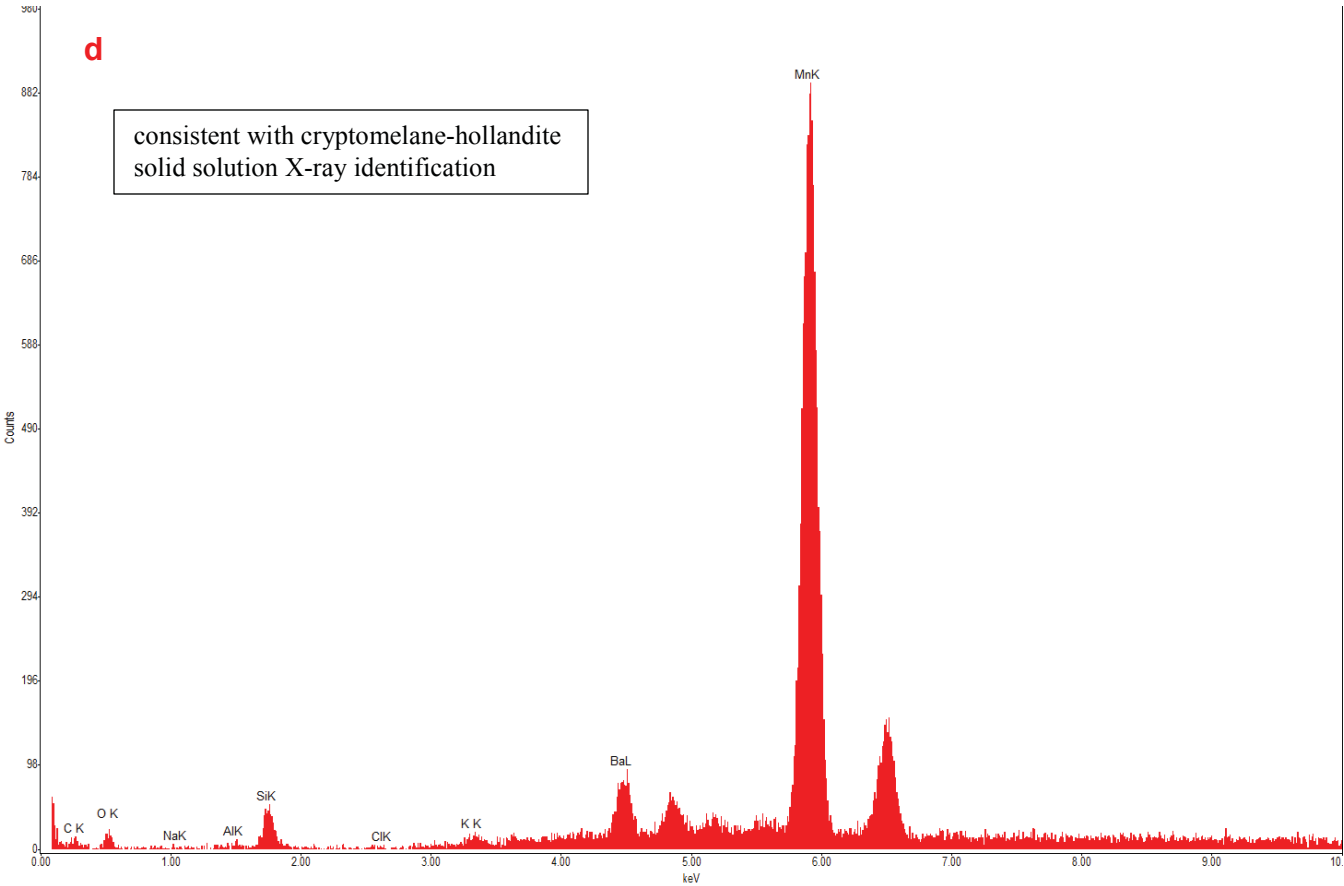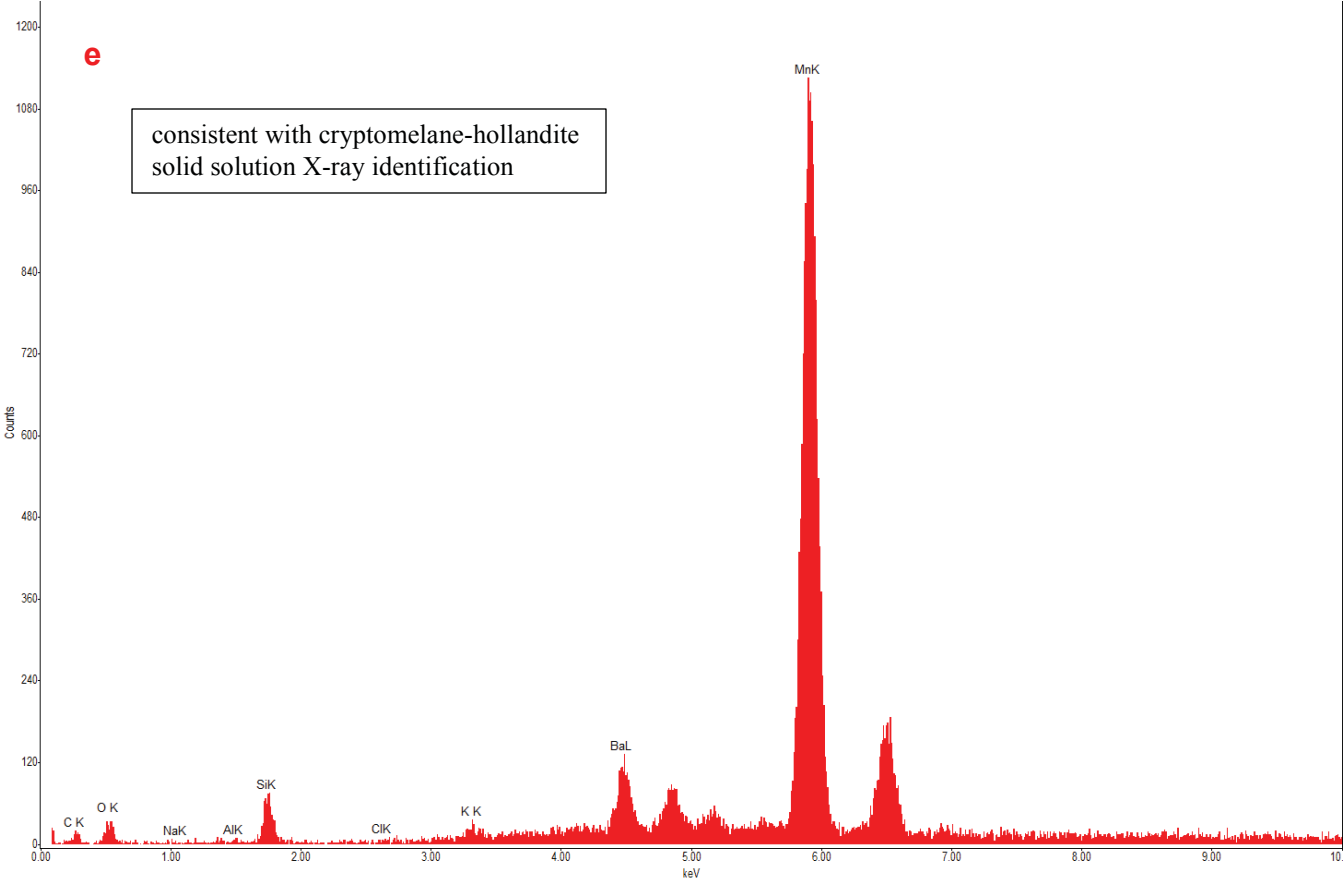

Associated SEM-EDS data (Appalachian State University): Sample SH-1 (Fig 5D, 7A, 7B)

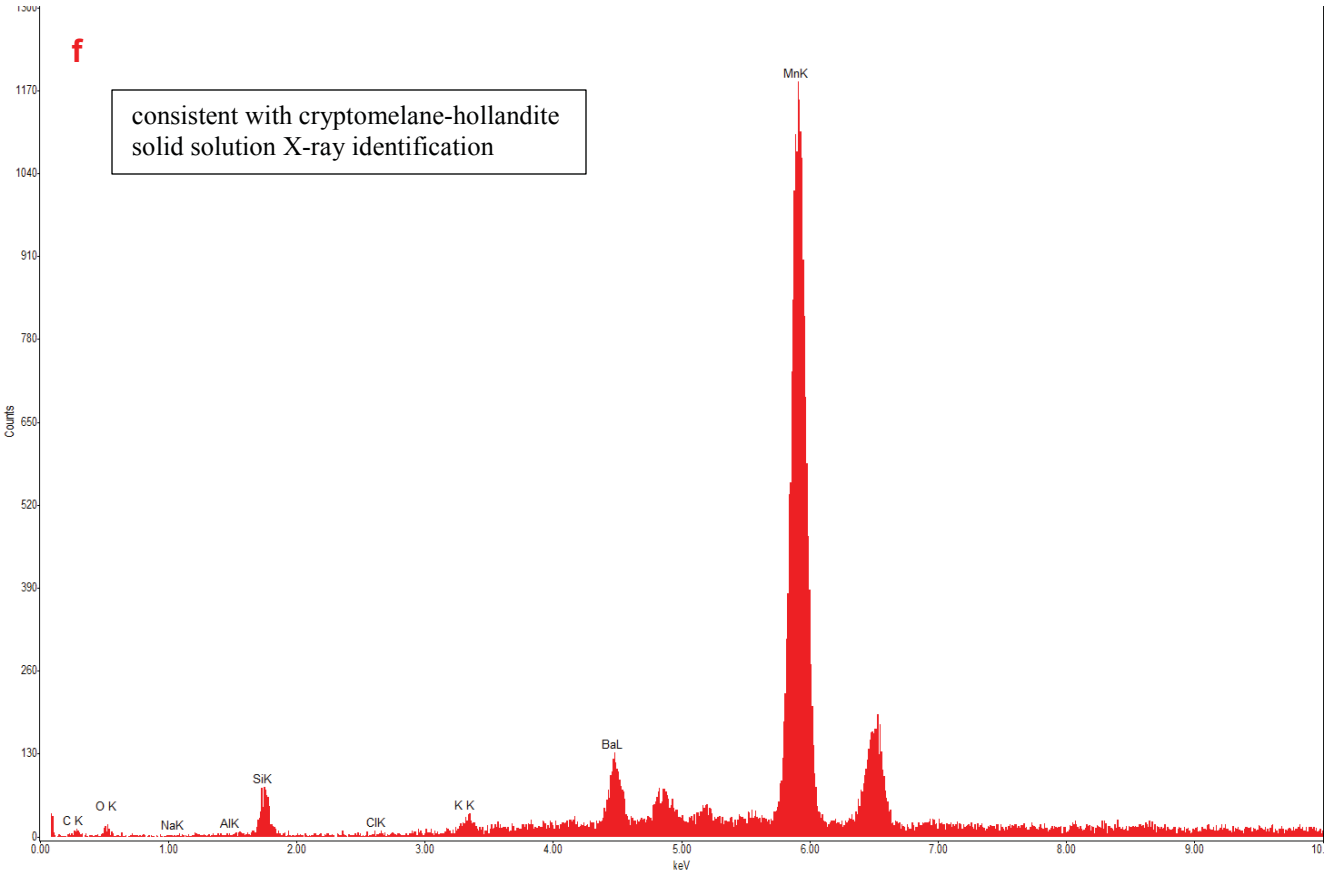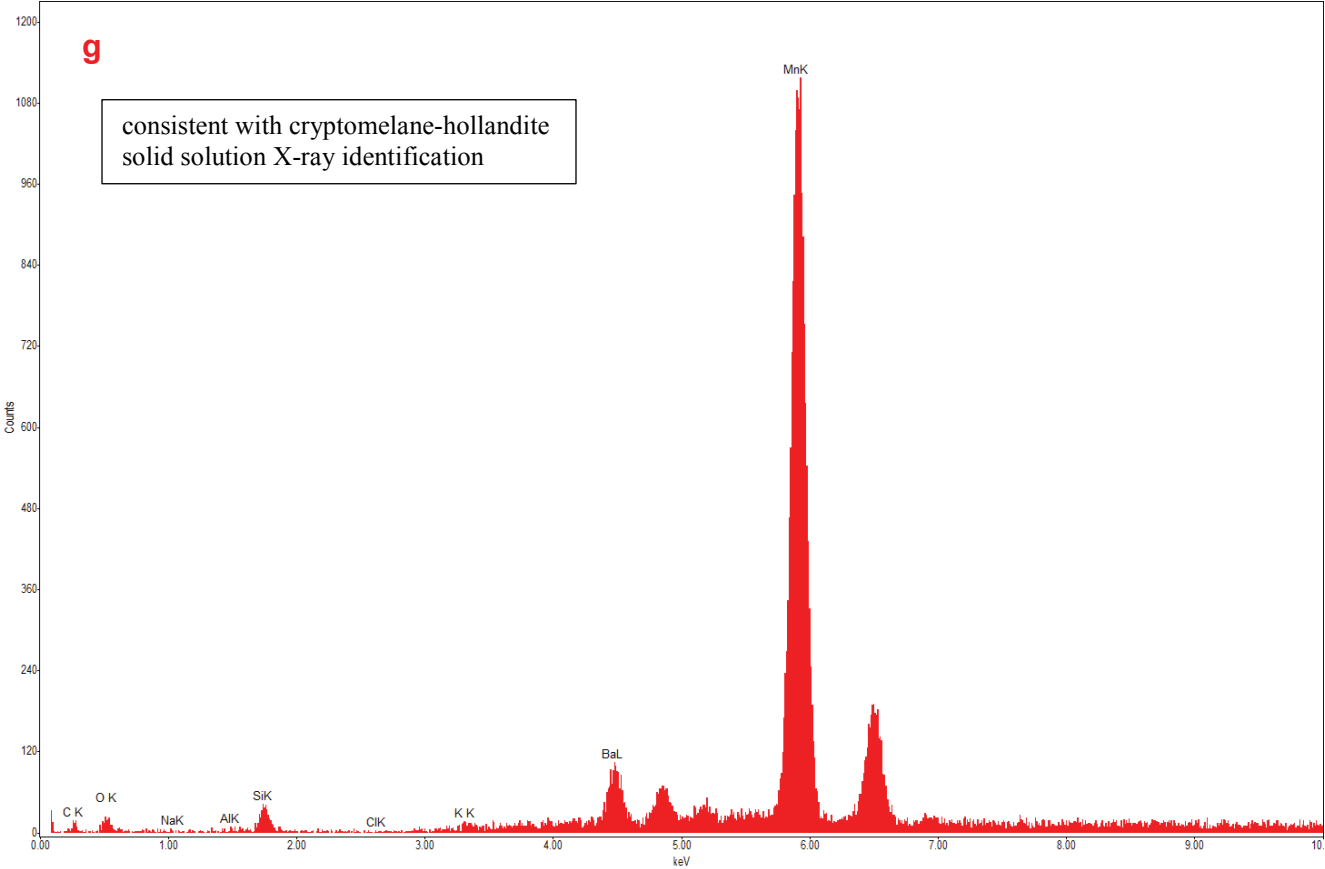

Associated SEM-EDS data (Appalachian State University): Sample SH-1 (Fig 5D, 7A, 7B)

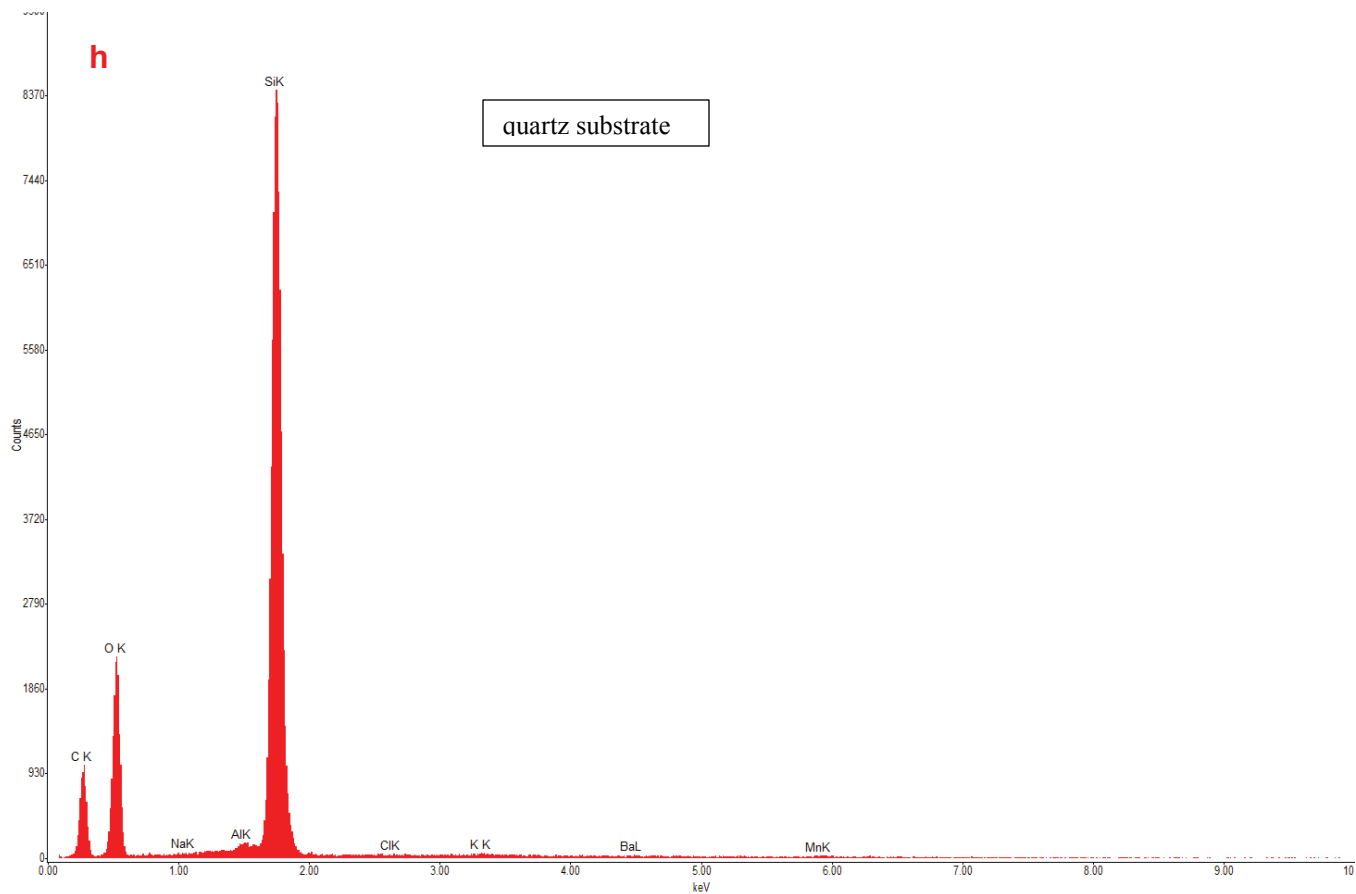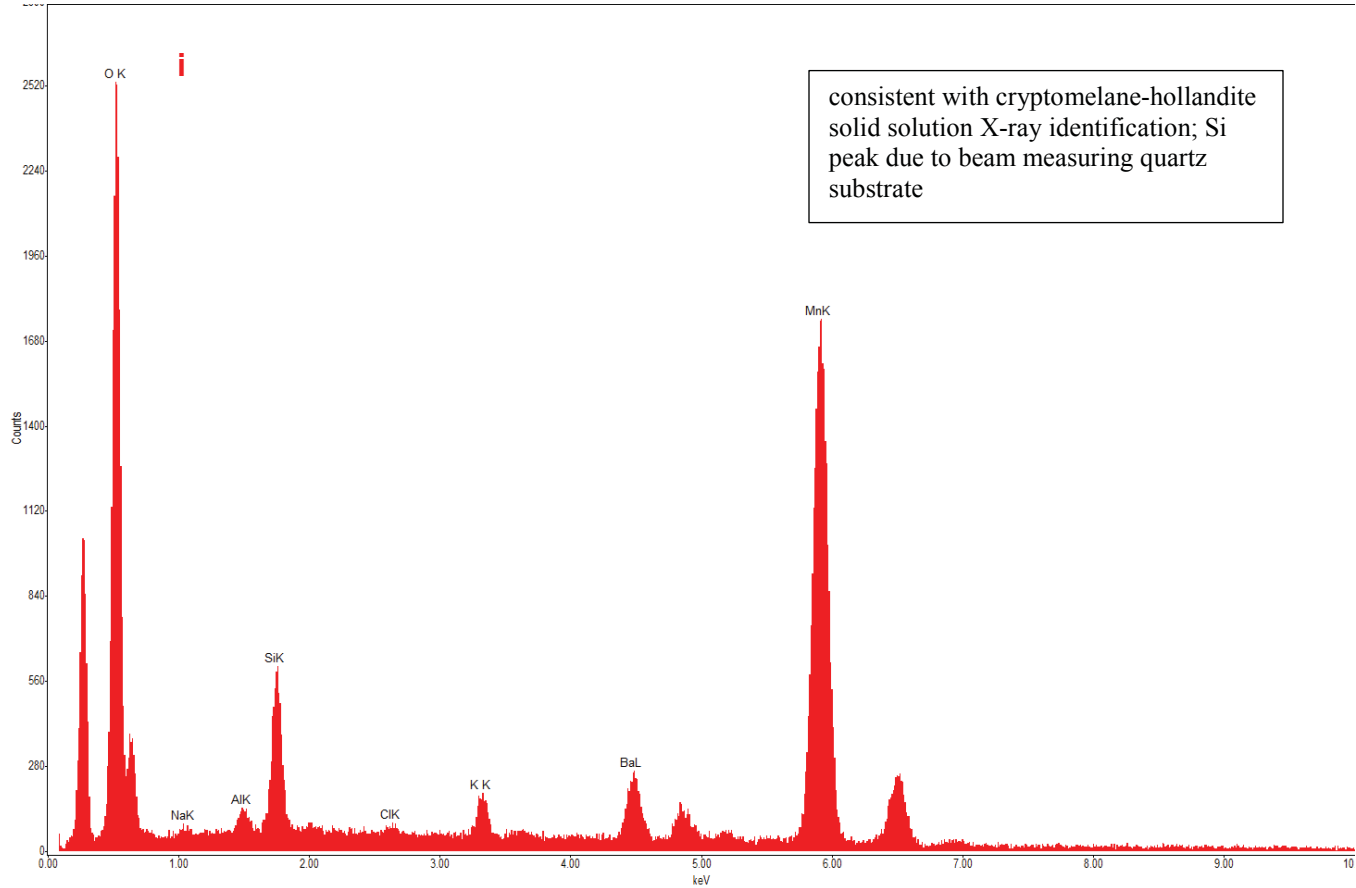

Associated SEM-EDS data (Appalachian State University): Sample SH-2 (Fig 9C, 9D)

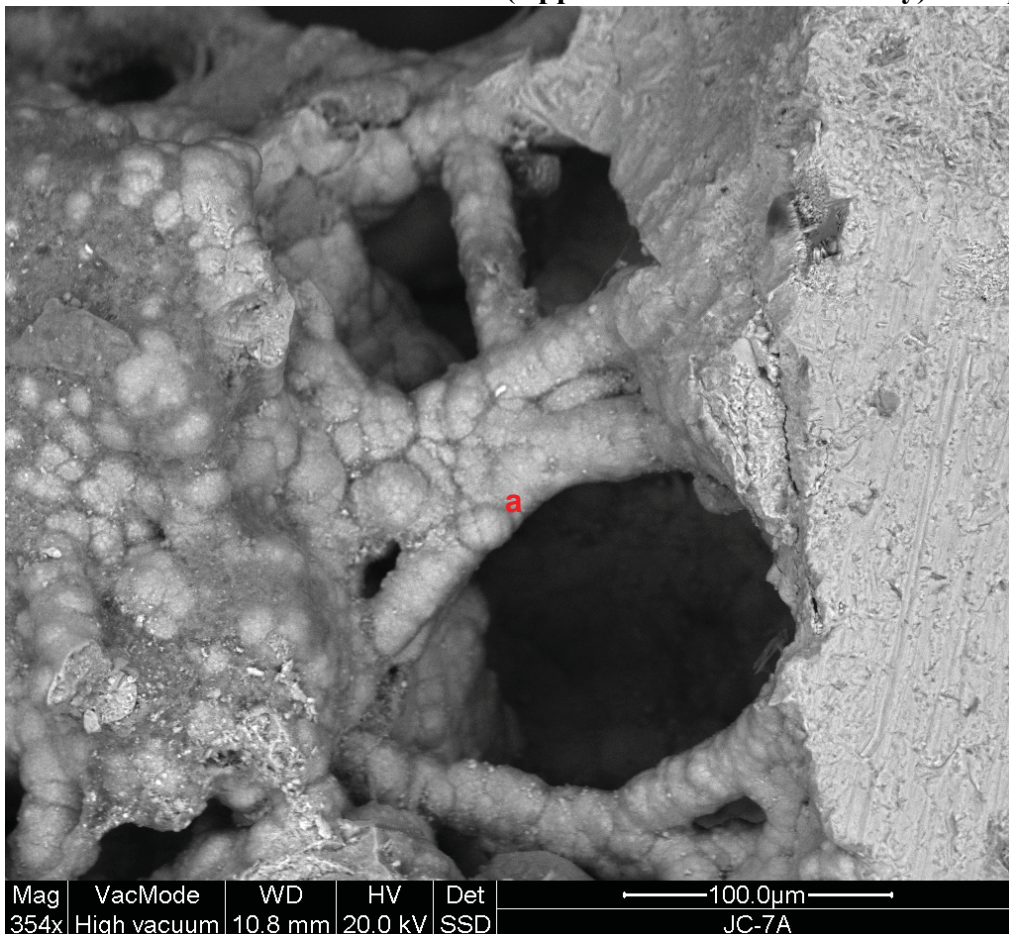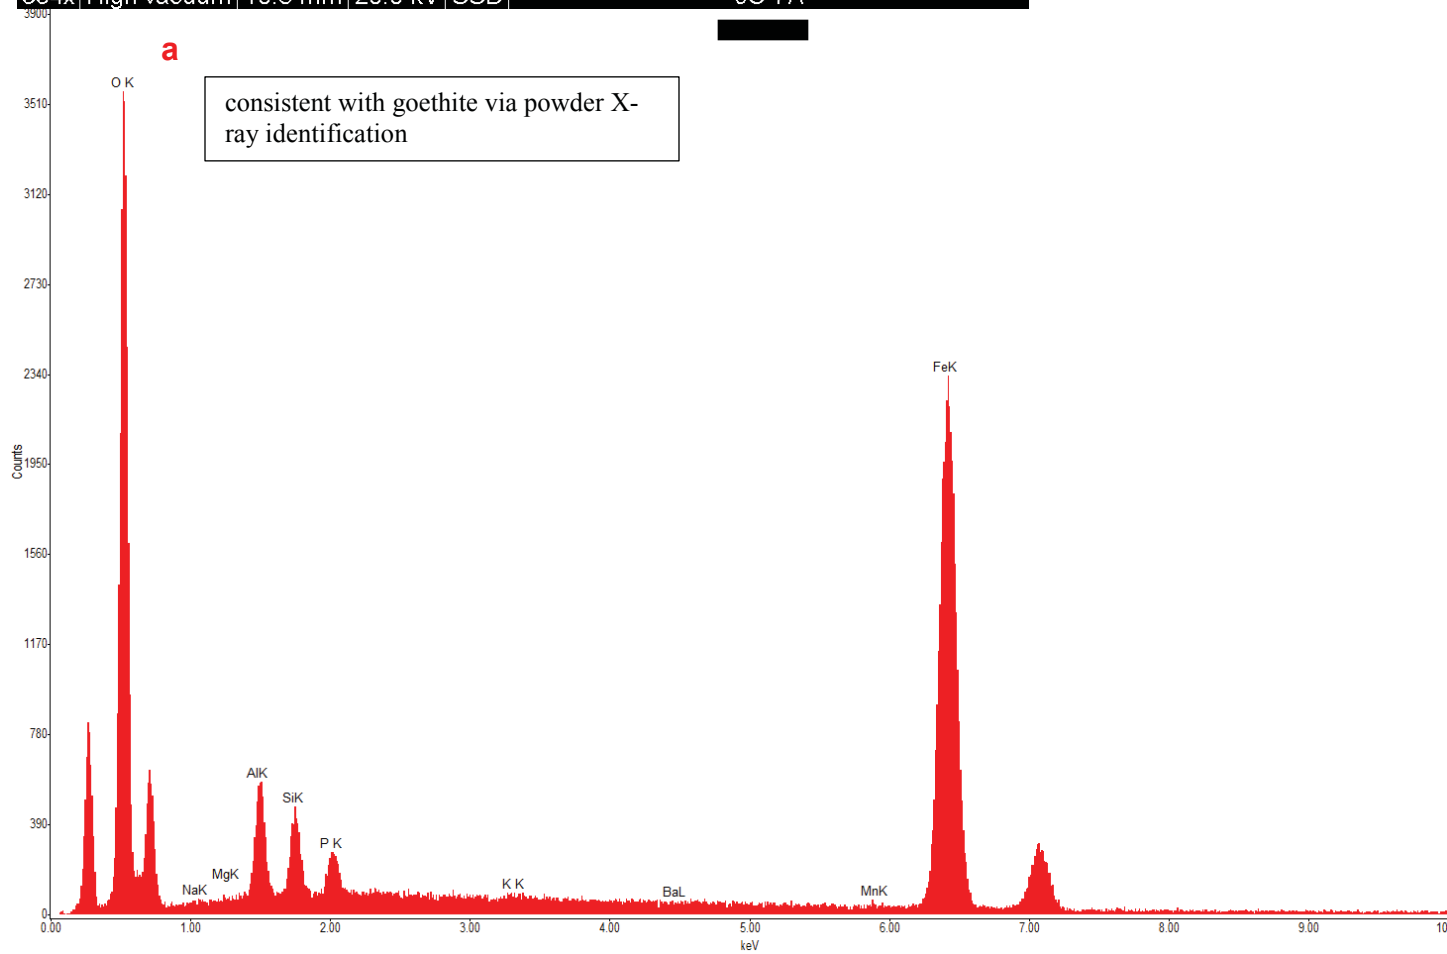



Associated SEM-EDS data (Appalachian State University): Sample SH-2 (Fig 9C, 9D)

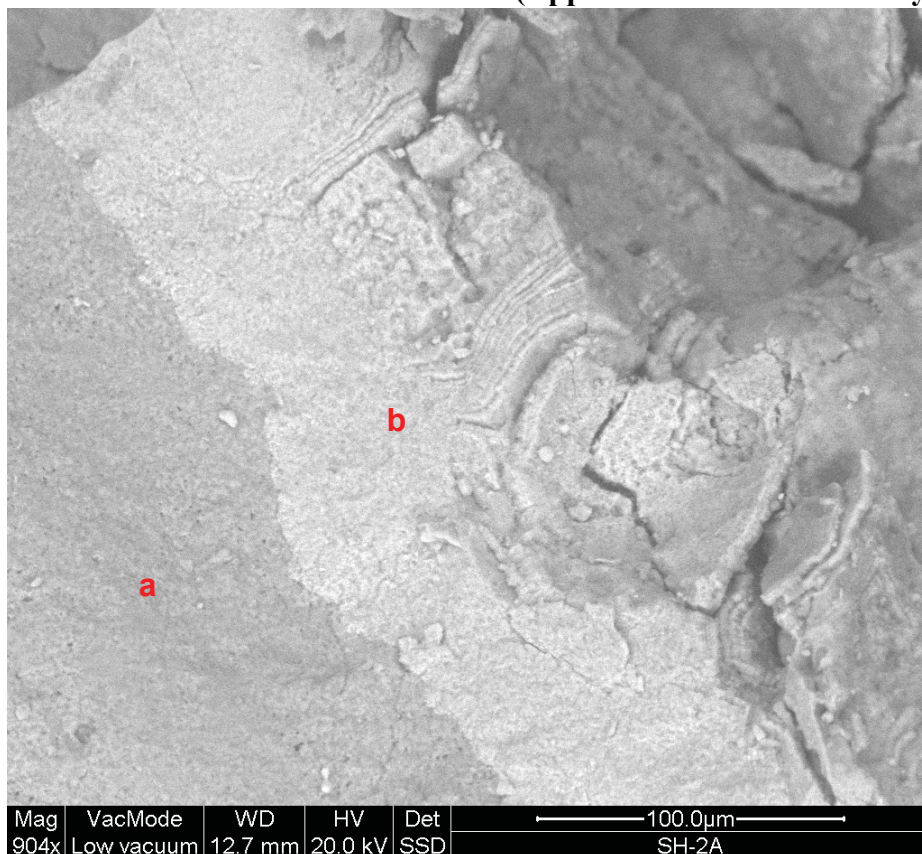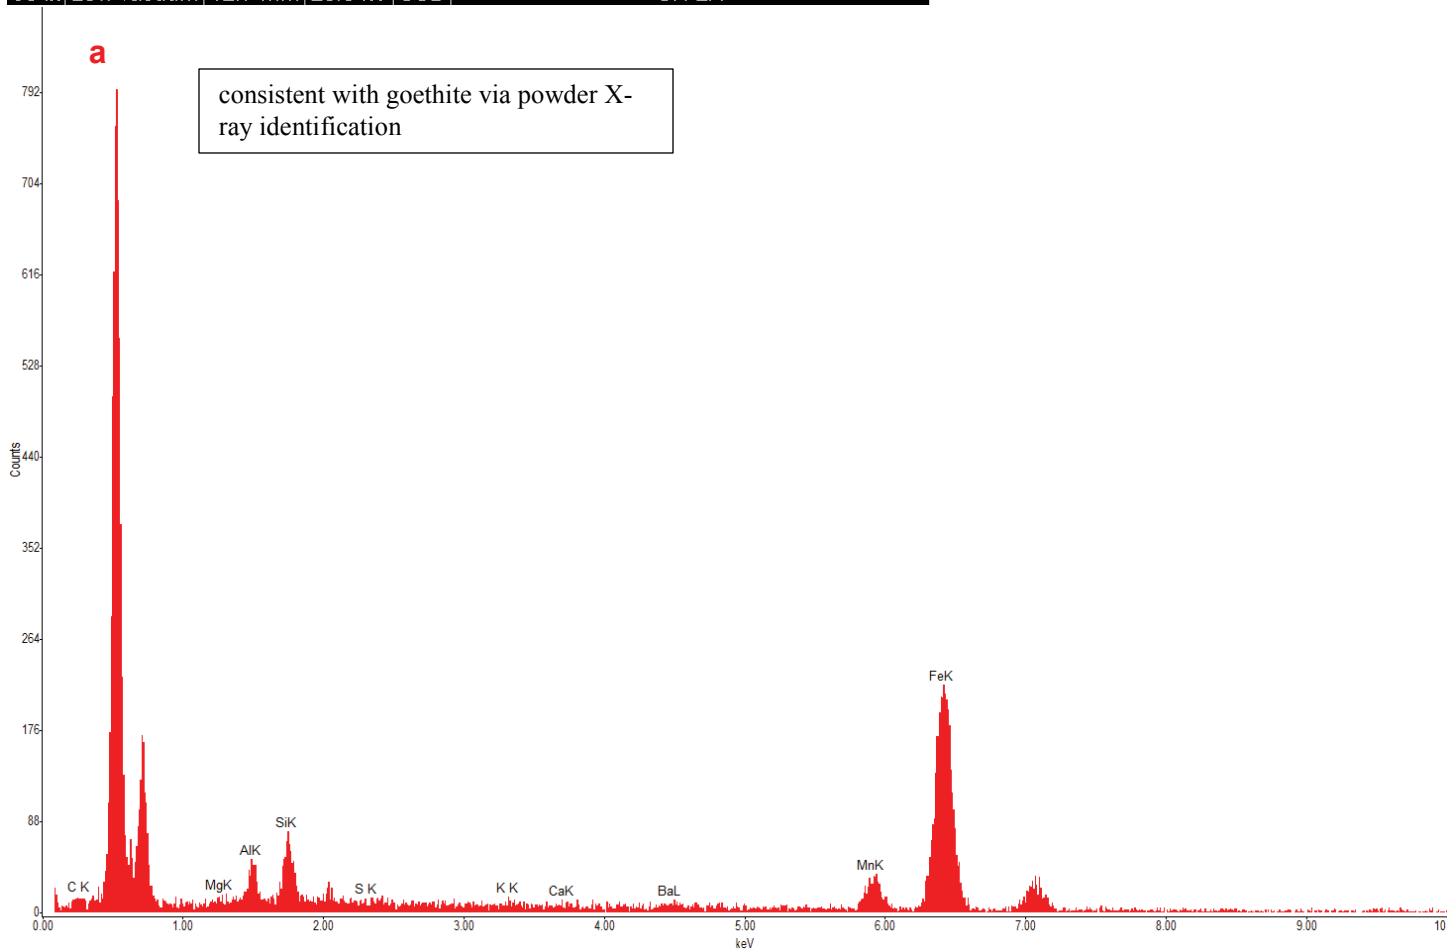

# Associated SEM-EDS data (Appalachian State University): Sample SH-2 (Fig 9C, 9D)

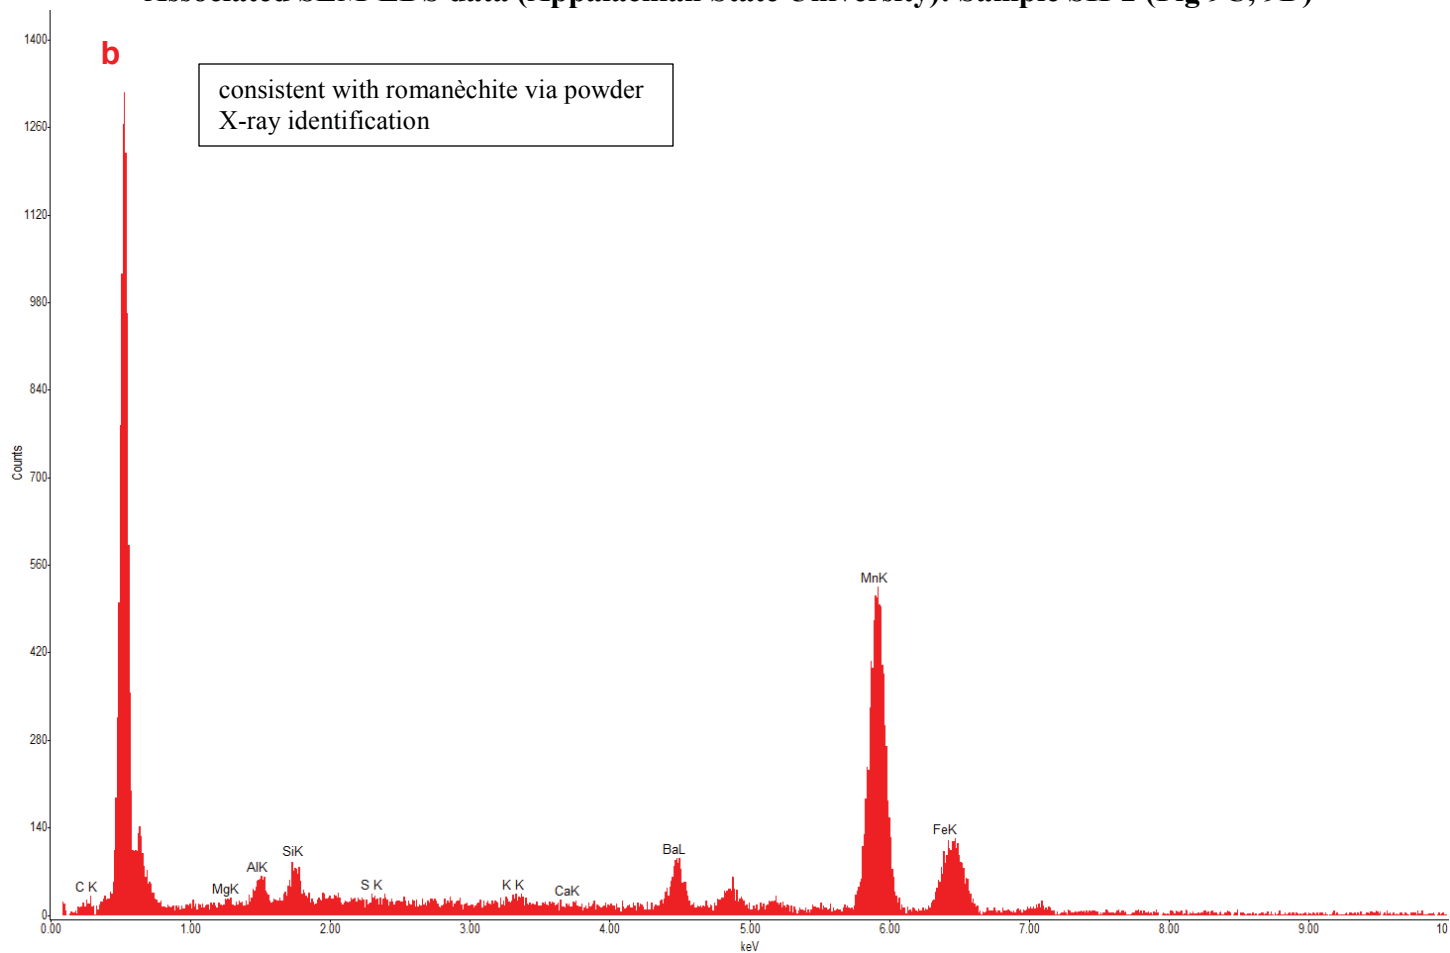

## **Energy-dispersive X-ray spectroscopy data for Figures 10A, 10D, 11A, 11C, 11F**

All energy-dispersive X-ray spectroscopy (EDS) data were collected at the U.S. Geological Survey in Reston, VA on a Hitachi SU-5000 field emission SEM equipped with an EDAX silicon drift detector (SDD) (30 mm<sup>2</sup>). The polished thin sections were carbon coated and examined under high vacuum at an accelerating voltage of 15kV and a working distance of ~10 mm (working distance for maximum collection efficiency on the SDD).

Initial peak identification was done by the EDAX-TEAM software. Spurious peak identifications were removed manually. EDS analyses were used in a qualitative capacity for phase identification and to document major element variations (e.g. Ba vs. K) that resulted in observed brightness variations in manganese oxide minerals in backscatter electron images.

Provided here is a subset of EDS analyses with annotation. We emphasize that these spectra were used in a qualitative capacity only.

\*Any use of trade, firm, or product names is for descriptive purposes only and does not imply endorsement by the U.S. Government.

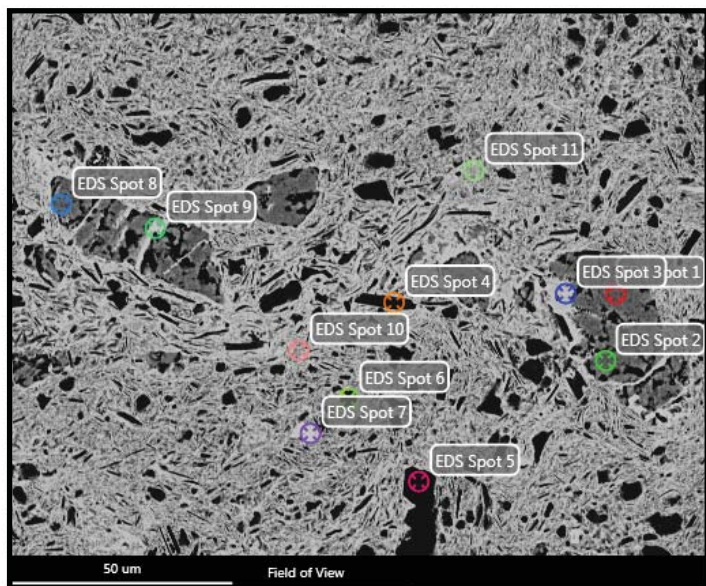

## EDS spectra for Figure 10A (K13-07-12B2-nodule)

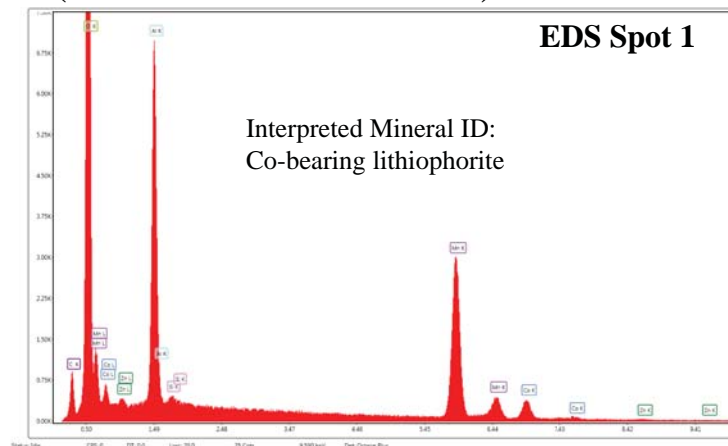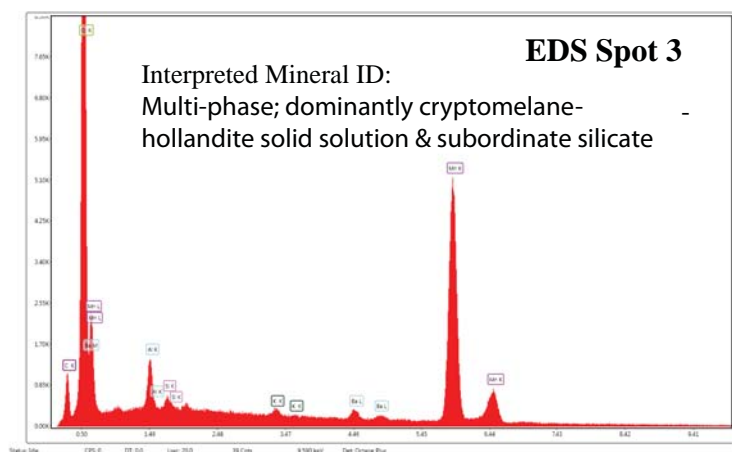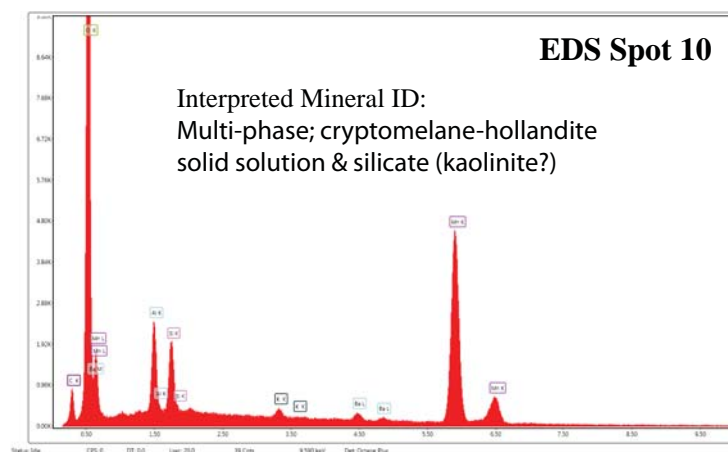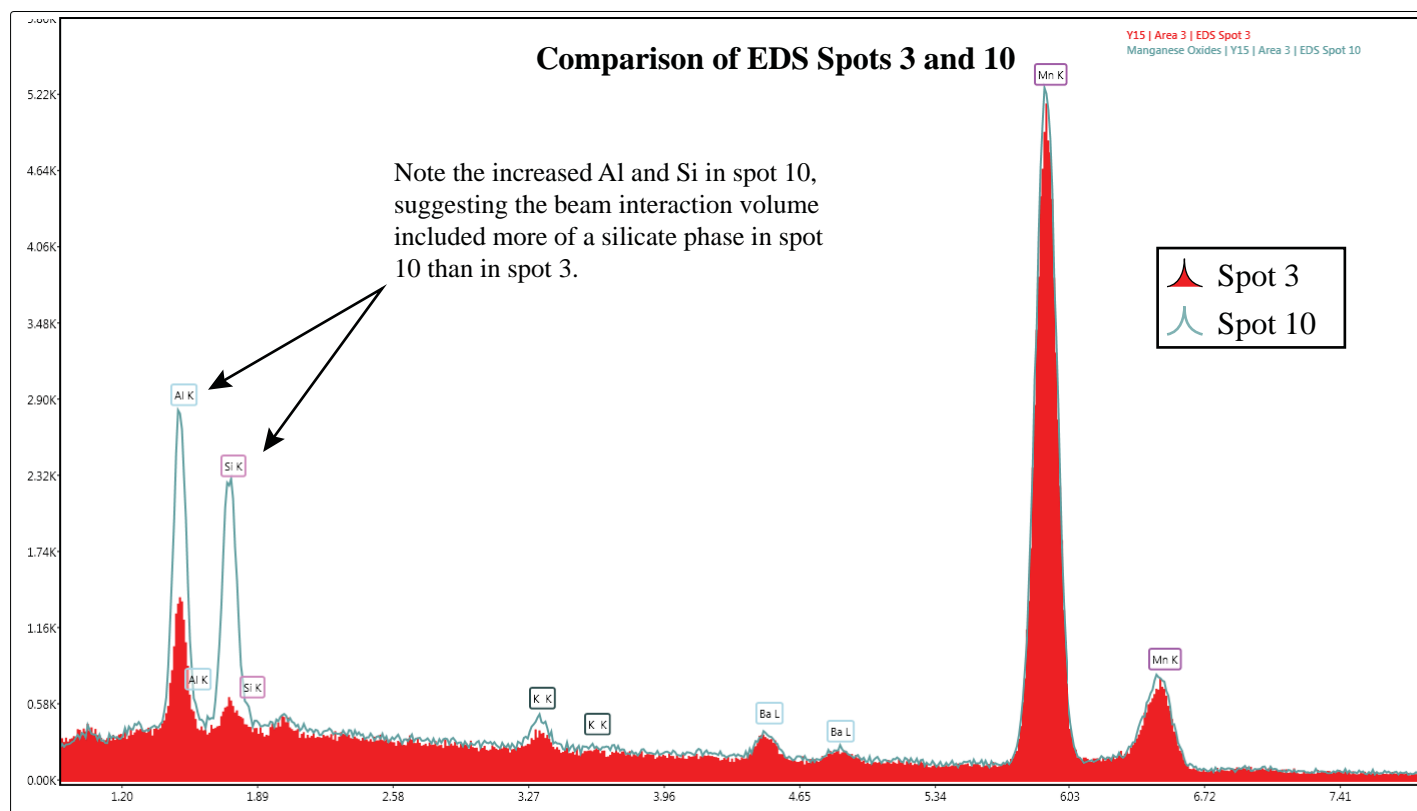

# EDS spectra for Figure 10D (K13-07-12B2-nodule)

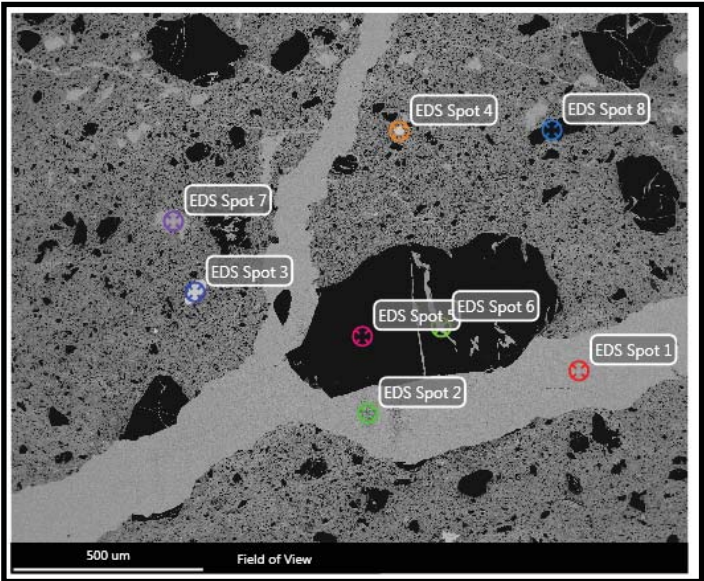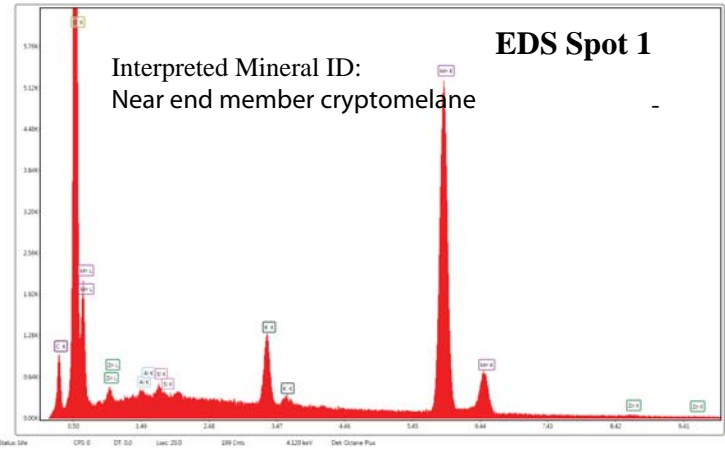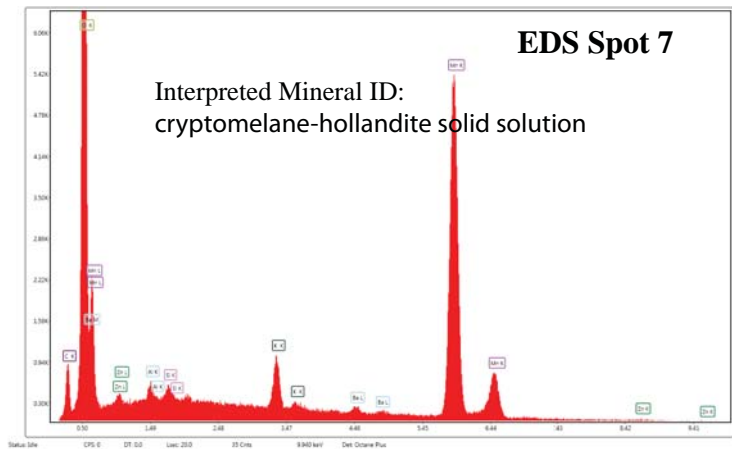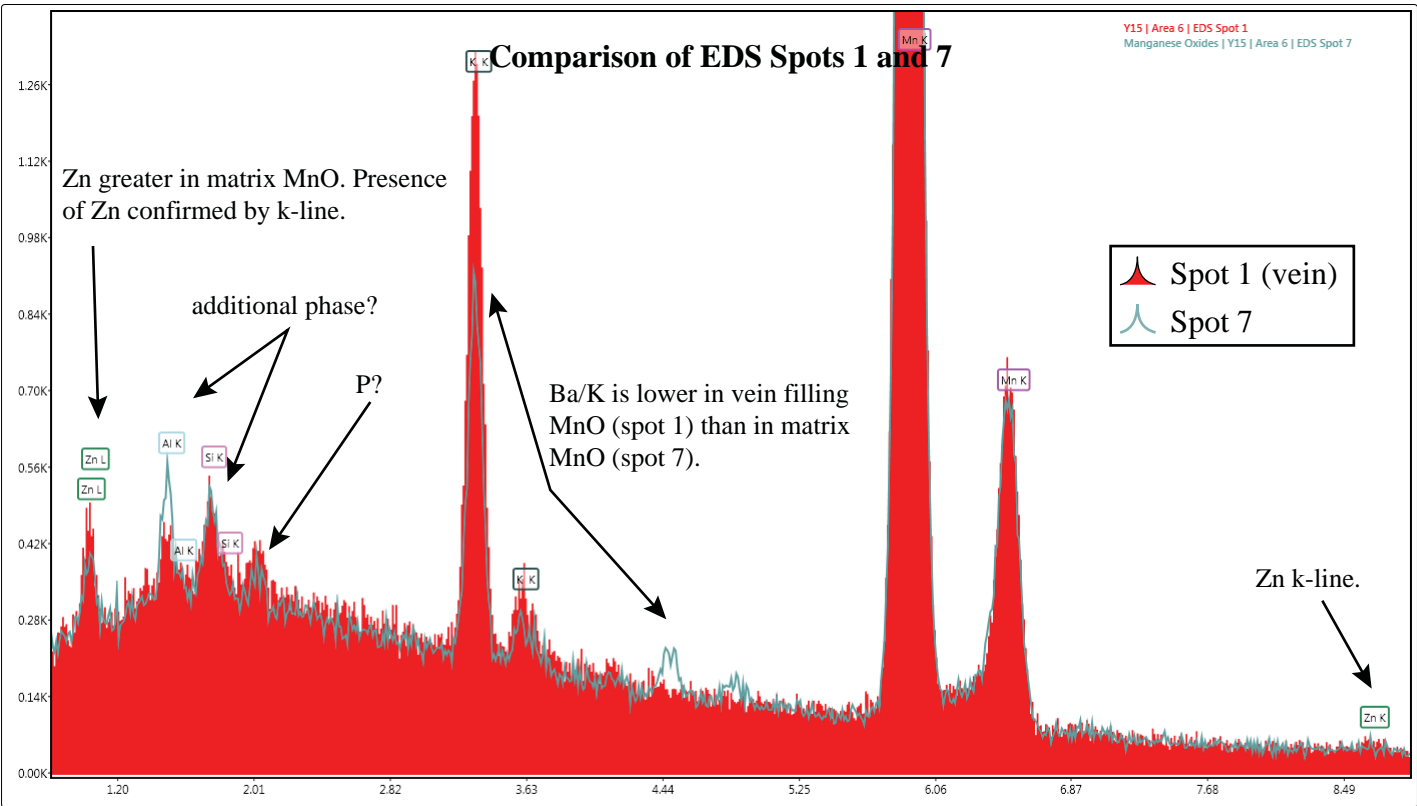



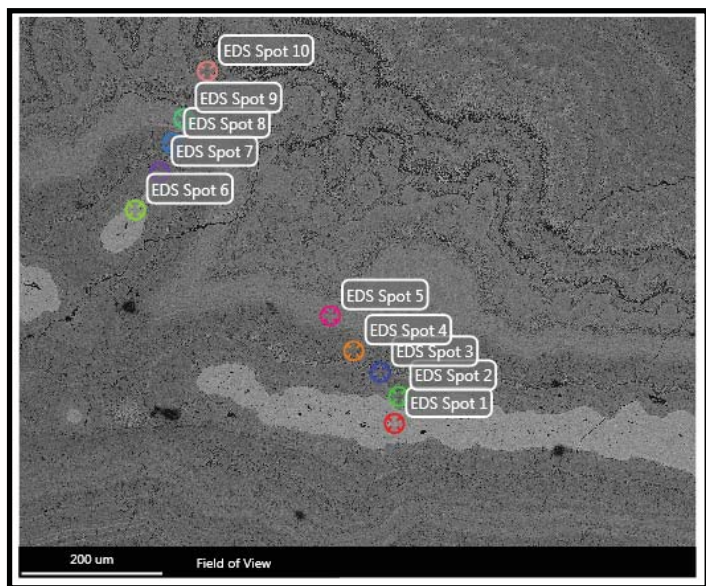

# EDS spectra for Figure 11A (K13-06-18B-breccia cement)

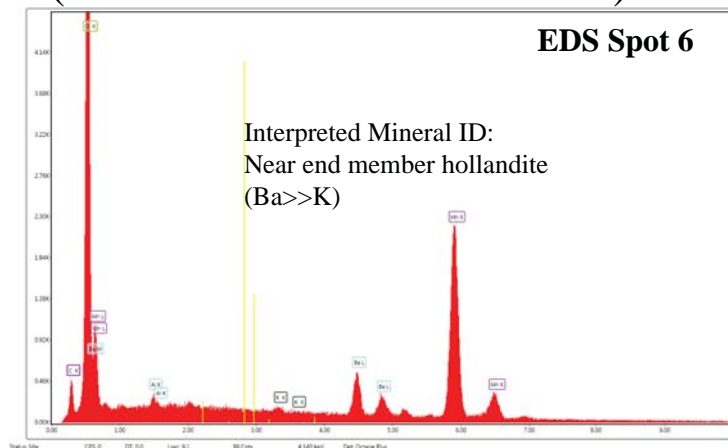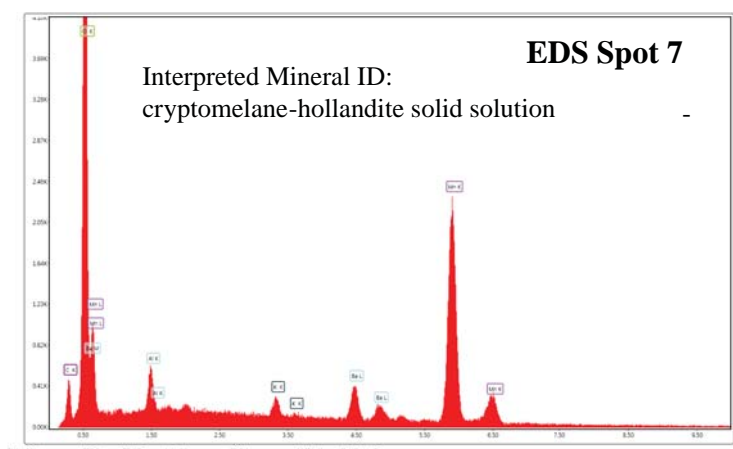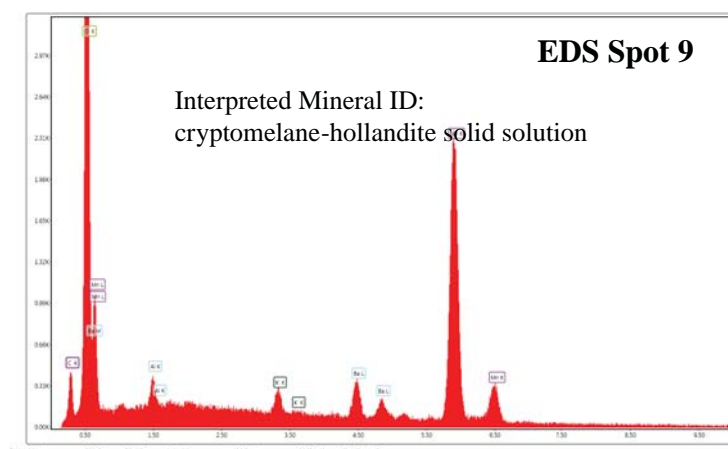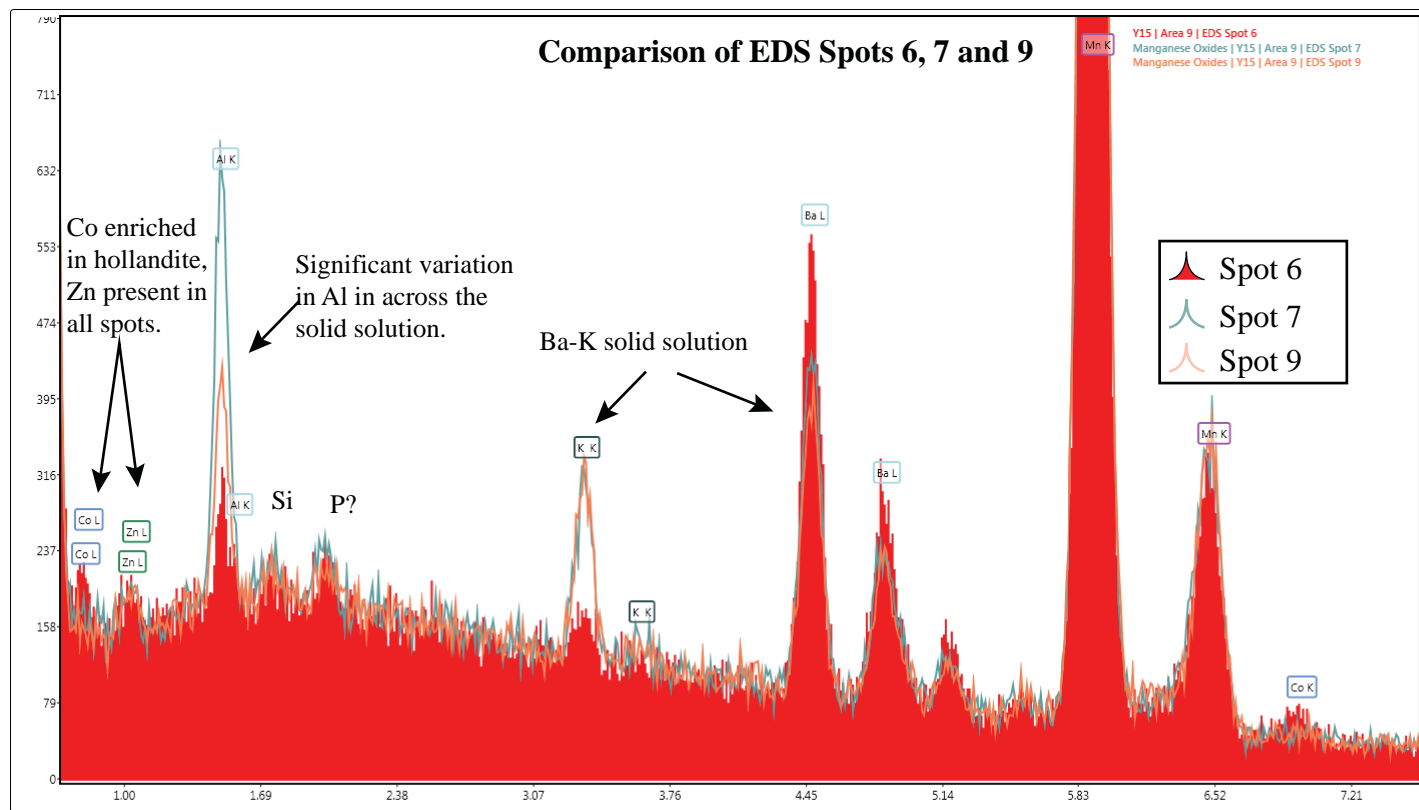

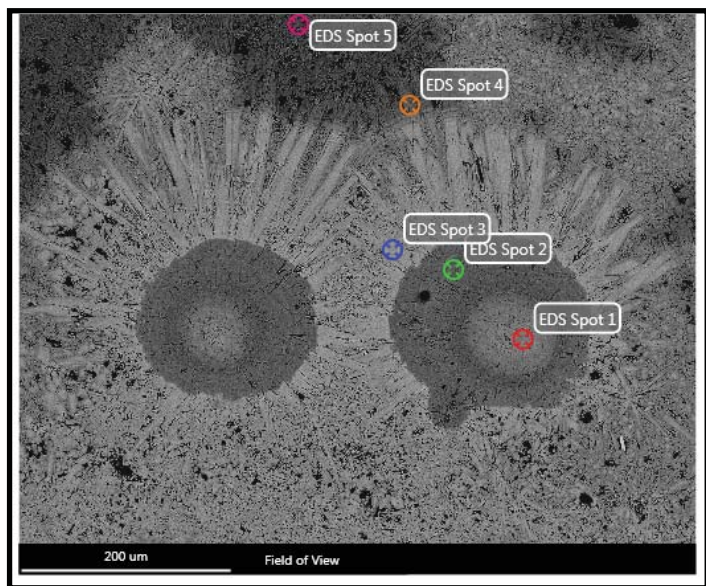

# EDS spectra for Figure 11C (K13-06-18B-breccia “sunflowers”)

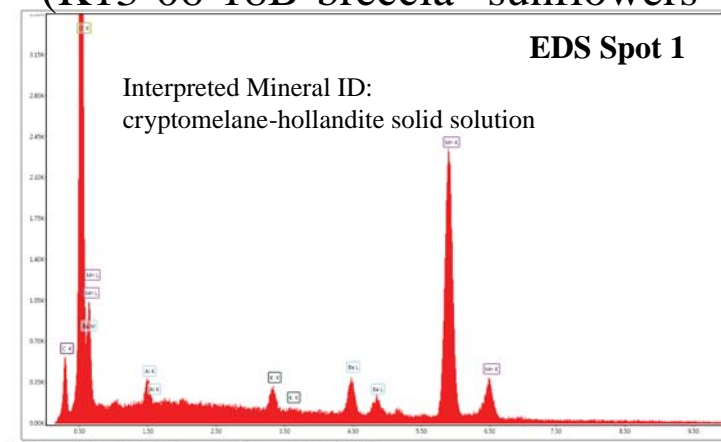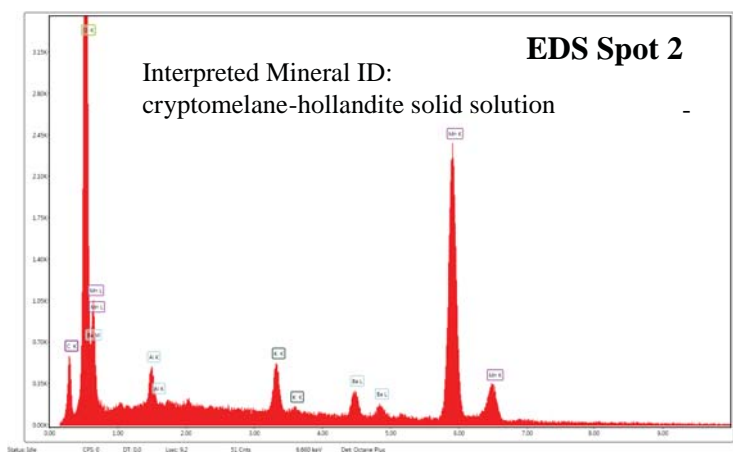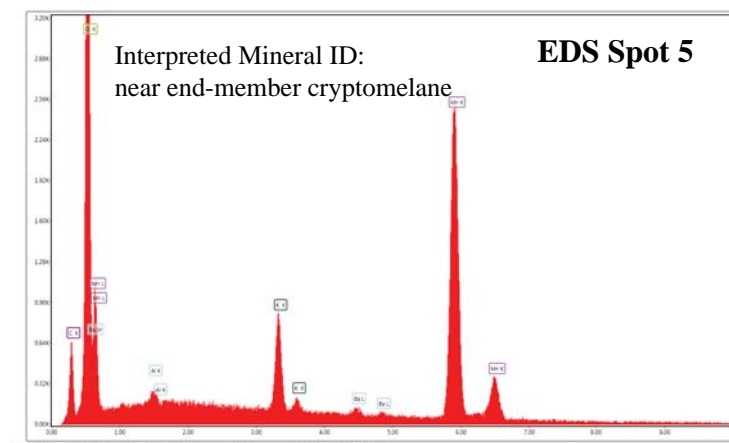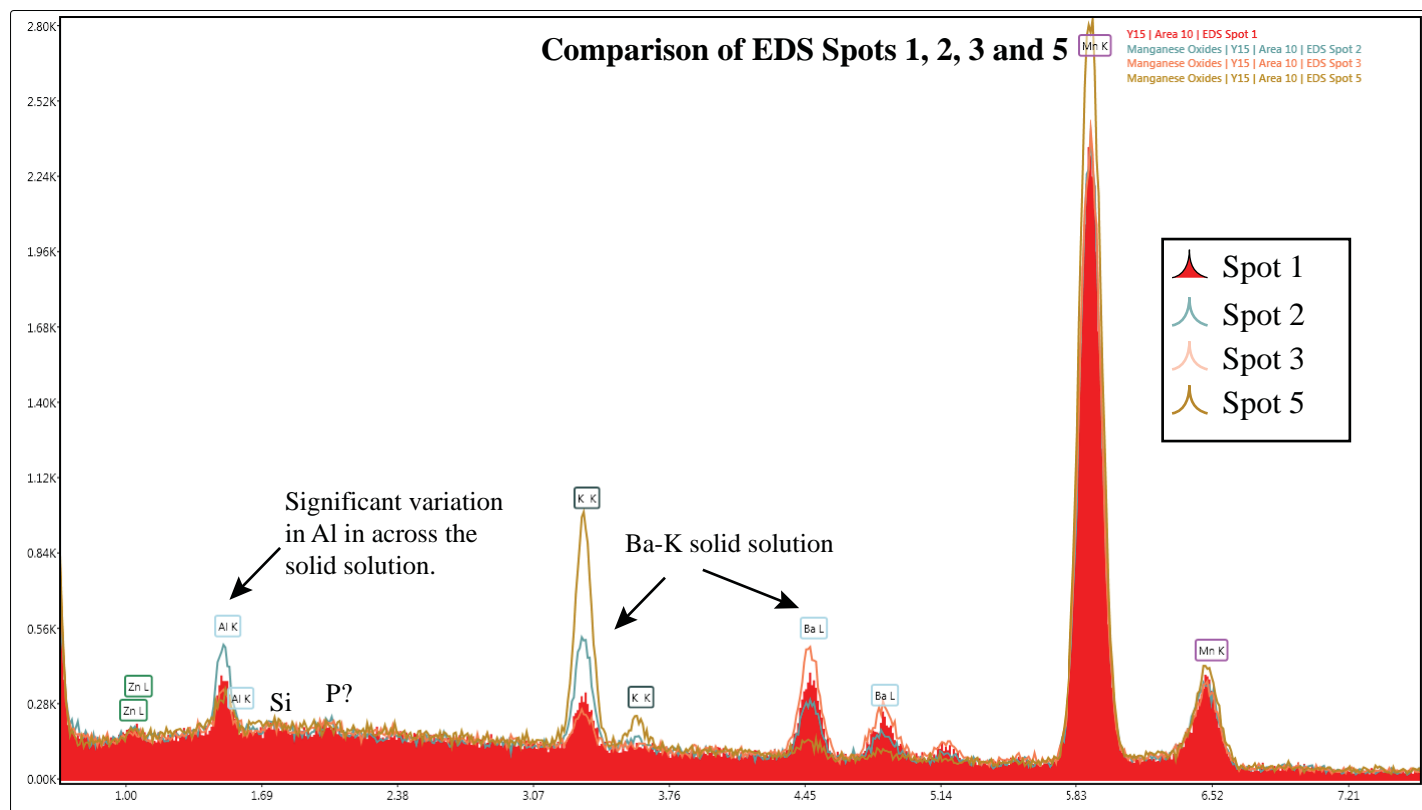

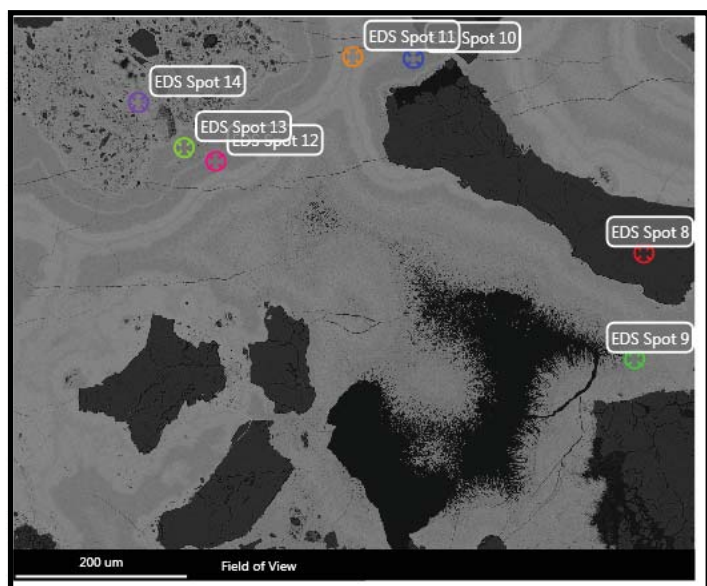

# EDS spectra for Figure 11F (K13-06-18B-breccia, multiple growth)

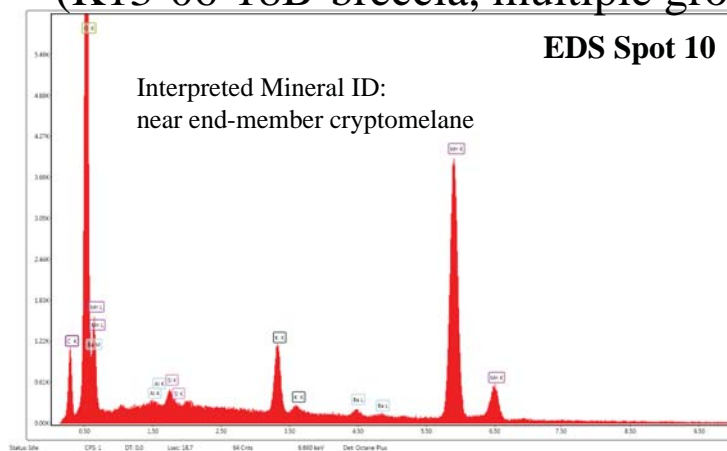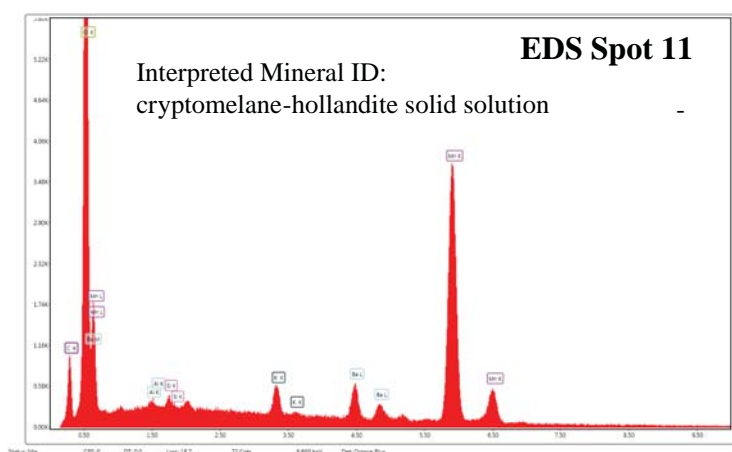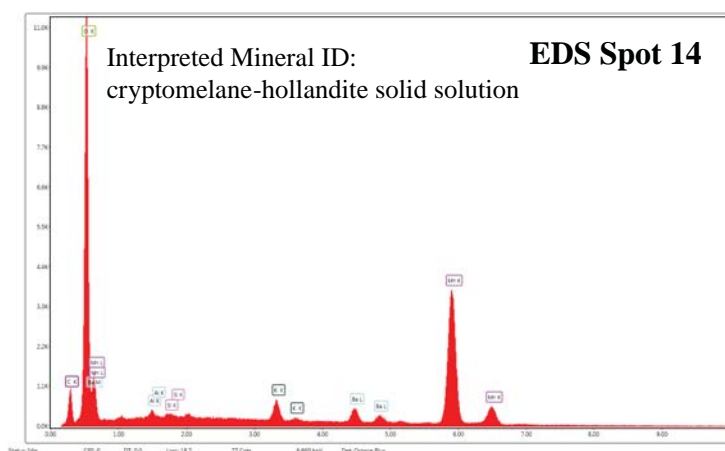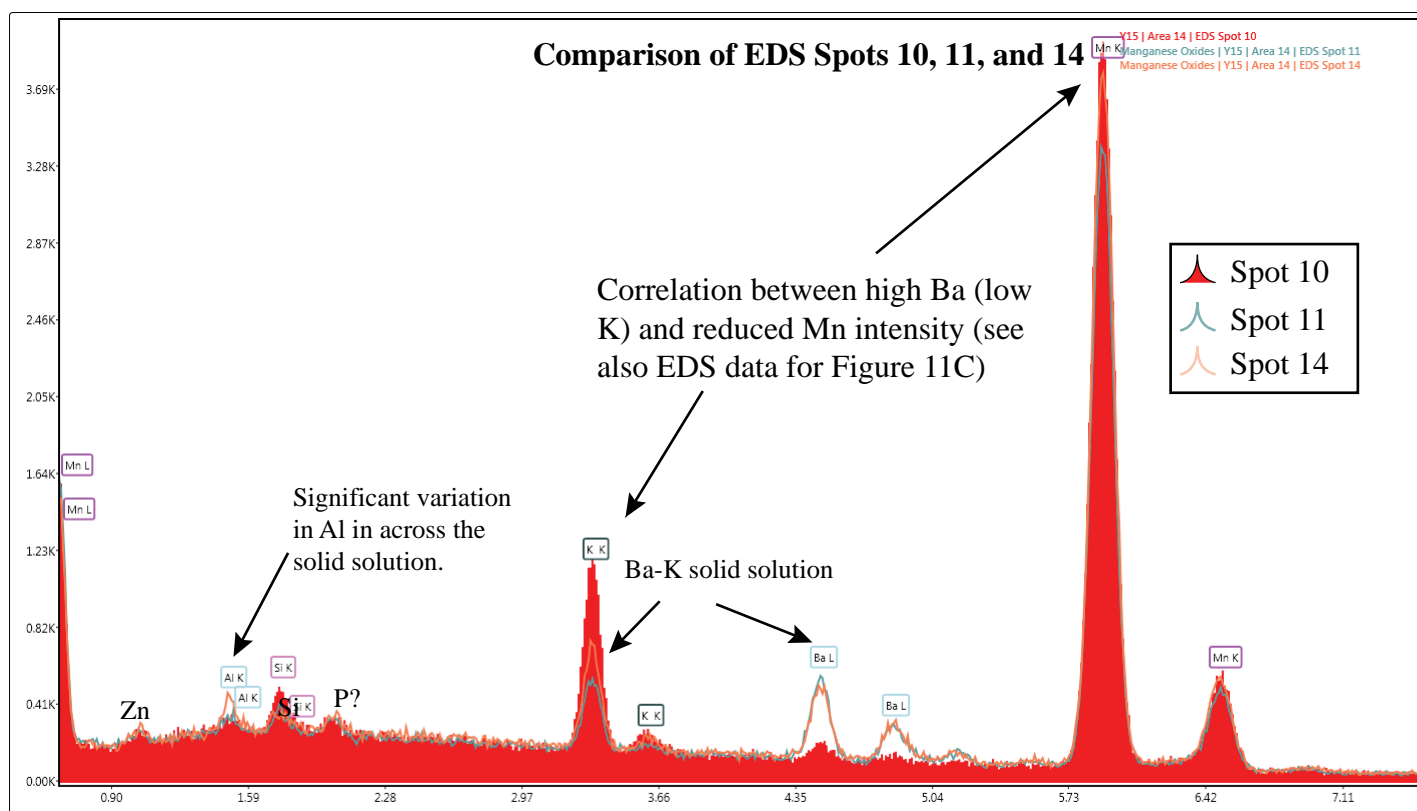

# DR File 3

## Final Report: Activation Laboratories

| Sample #    | description                      | details                                                                      | SiO2  | Al2O3 | Fe2O3(T) | MnO   | MgO    | CaO    | Na2O | K2O  | TiO2  | P2O5 |
|-------------|----------------------------------|------------------------------------------------------------------------------|-------|-------|----------|-------|--------|--------|------|------|-------|------|
| AM-01       | nodule                           | Merschat nodule sample                                                       | 28.03 | 9.47  | 3.38     | 36.54 | 0.32   | 0.11   | 0.12 | 5.88 | 0.365 | 0.15 |
| DR150124-B  | nodule                           | Mt City platy Mn-oxide nodule                                                | 28.5  | 9.00  | 2.79     | 36.56 | 0.33   | 0.05   | 0.14 | 6.70 | 0.376 | 0.16 |
| K130712-A   | nodule                           | Stanley nodule; Mick's sample A                                              | 5.24  | 2.81  | 0.59     | 69.6  | 0.11   | 0.33   | 0.23 | 2.16 | 0.064 | 0.38 |
| K130712-B   | nodule                           | Stanley nodule; Mick's sample B                                              | 12.89 | 4.66  | 2.11     | 62.32 | 0.19   | 0.12   | 0.09 | 1.70 | 0.223 | 0.38 |
| K130712-B2  | nodule                           | Stanley nodule; Mick's sample B-rep                                          | 19.86 | 5.88  | 2.23     | 54.69 | 0.18   | 0.11   | 0.07 | 1.34 | 0.303 | 0.34 |
| DR150417-A  | quartzite breccia matrix         | Lyndhurst breccia; MnO ore float sample, has mixed age, mixed phases         | 1.35  | 2.38  | 0.30     | 75.69 | 0.02   | 0.20   | 0.28 | 1.74 | 0.013 | 0.51 |
| DRBYC-646   | quartzite breccia matrix         | Larry's place breccia; xstln cryptomelane - clean cryptomelane               | 6.05  | 1.67  | 0.19     | 68.22 | < 0.01 | 0.16   | 0.28 | 1.08 | 0.005 | 0.11 |
| K130618-A   | quartzite breccia matrix         | Larry's place breccia; Mick's sample, dated - clean cryptomelane             | 3.02  | 2.79  | 5.09     | 63.74 | < 0.01 | 0.15   | 0.2  | 0.95 | 0.006 | 0.35 |
| K130618-B   | quartzite breccia matrix         | Larry's place breccia; Mick's sample, dated - clean cryptomelane             | 1.48  | 1.14  | 0.39     | 73.91 | < 0.01 | 0.19   | 0.16 | 0.59 | 0.008 | 0.29 |
| K130618-C   | quartzite breccia matrix         | Linden quad breccia; corner quarry, Mick's sample-dated - clean cryptomelane | 2.2   | 0.73  | 0.47     | 70.55 | < 0.01 | 0.07   | 0.06 | 0.35 | 0.003 | 0.35 |
| K130712-C1  | quartzite breccia matrix         | Compton mine breccia; Mick's sample, dated                                   | 1.34  | 0.79  | 0.13     | 71.76 | < 0.01 | 0.08   | 0.07 | 0.37 | 0.009 | 0.28 |
| DR150124-A2 | silicified shady dolomite CLAST  | Mt City breccia; clast of mostly chert                                       | 94.78 | 1.03  | 2.12     | 0.201 | 0.09   | 0.06   | 0.03 | 0.30 | 0.041 | 0.06 |
| DR150124-A1 | silicified shady dolomite matrix | Mt City breccia; fracture fill-dendrites                                     | 24.9  | 4.81  | 2.66     | 49.71 | 0.1    | 0.11   | 0.13 | 2.64 | 0.24  | 0.56 |
| JC-7c       | shrub                            | Mtn City breccia; cryptomelane-hollandite                                    | 2.71  | 2.3   | 4.71     | 70.49 | 0.03   | 0.16   | 0.18 | 2    | 0.022 | 0.92 |
| JC-7b       | nodule                           | Mtn City breccia; romanechite, microcline                                    | 29.36 | 8.1   | 5.9      | 35.97 | 0.41   | 0.09   | 0.12 | 5.44 | 0.335 | 0.2  |
| JC-10       | frothy layered stromatolite      | from Tina Delahunty's garage pit                                             | 2.7   | 1.35  | 81.83    | 0.232 | 0.05   | < 0.01 | 0.02 | 0.1  | 0.037 | 2.47 |
| SH-2        | silicified shady dolomite matrix | float piece from Steve Hageman                                               | 22.1  | 1.64  | 26.94    | 32.61 | 0.02   | 0.06   | 0.05 | 0.21 | 0.02  | 0.35 |

# DR File 3

## Final Report: Activation Laboratories

| Sample #    | BaO    | CoO   | ZnO   | LOI   | Total  | Li   | Sc | Be  | V   | Cr          | Co   | Ni  | Cu   | Zn   | Ga  | Ge    | As | Rb   | Sr   | Y    | Zr    | Nb    | Mo    | Ag    | In    | Sn    | Sb    | Cs     | Ba    | La   | Ce   | Pr   |
|-------------|--------|-------|-------|-------|--------|------|----|-----|-----|-------------|------|-----|------|------|-----|-------|----|------|------|------|-------|-------|-------|-------|-------|-------|-------|--------|-------|------|------|------|
| AM-01       | 6.152  | 1.008 | 0.154 | 8.75  | 99.27  | 530  | 16 | 13  | 90  | 40 > 1000   | 670  | 370 | 1240 | 45   | 1.0 | 11    | 62 | 78   | 104  | 89   | 5.8   | 7     | < 0.5 | < 0.1 | 6     | < 0.2 | 2.6   | 55080  | 27.8  | 291  | 10.1 |      |
| DR150124-B  | 6.561  | 0.144 | 0.105 | 7.81  | 98.98  | 130  | 13 | 8   | 87  | 40 > 1000   | 250  | 160 | 840  | 39   | 0.8 | 8     | 72 | 39   | 49.8 | 85   | 4.4   | < 2   | < 0.5 | < 0.1 | < 1   | 0.2   | 2.4   | 58740  | 24    | 83.1 | 5.7  |      |
| K130712-A   | 2.519  | 0.137 | 0.798 | 13.43 | 97.46  | 20   | 17 | 327 | 41  | 440 > 1000  | 270  | 170 | 6410 | 50   | 1.5 | 8     | 29 | 2175 | 55.2 | 66   | 1.4   | < 2   | < 0.5 | < 0.1 | < 1   | 1.5   | 0.6   | 22550  | 28.5  | 353  | 13   |      |
| K130712-B   | 1.684  | 0.123 | 0.433 | 12.14 | 98.51  | 60   | 13 | 212 | 55  | 120         | 965  | 150 | 190  | 3480 | 51  | 1.6   | 8  | 25   | 985  | 82.5 | 63    | 3.3   | < 2   | 0.5   | < 0.1 | 1     | 0.7   | 1.7    | 15080 | 26.7 | 215  | 10.3 |
| K130712-B2  | 1.802  | 0.099 | 0.326 | 11.67 | 98.47  | 40   | 14 | 158 | 48  | 140         | 781  | 160 | 200  | 2620 | 50  | 1.1   | 11 | 23   | 787  | 74.8 | 99    | 4.6   | < 2   | 0.7   | < 0.1 | < 1   | 0.6   | 1.7    | 16130 | 27.5 | 186  | 10.5 |
| DR150417-A  | 4.890  | 1.156 | 0.128 | 11.95 | 99.32  | 190  | 5  | 13  | 33  | 30 > 1000   | 350  | 550 | 1030 | 49   | 1.3 | 12    | 11 | 390  | 276  | 104  | 0.2   | 12    | < 0.5 | < 0.1 | < 1   | < 0.2 | < 0.1 | 43780  | 11.7  | 55   | 11.3 |      |
| DRBYC-646   | 8.871  | 0.198 | 0.045 | 11.62 | 98.26  | < 10 | 2  | 4   | < 5 | 70 > 1000   | 40   | 570 | 360  | 35   | 1.6 | < 5   | 10 | 35   | 66.3 | 193  | 3.7   | < 2   | < 0.5 | < 0.1 | 4     | < 0.2 | < 0.1 | 79430  | 26.9  | 59.5 | 8.37 |      |
| K130618-A   | 9.710  | 0.261 | 0.039 | 12.35 | 98.36  | 20   | 10 | 9   | 26  | 30 > 1000   | 40   | 670 | 310  | 39   | 2.2 | 9     | 7  | 19   | 93   | 80   | 9.3   | 2     | < 0.5 | < 0.1 | < 1   | 0.3   | < 0.1 | 86940  | 16.8  | 77.8 | 6.9  |      |
| K130618-B   | 10.383 | 0.200 | 0.042 | 10.51 | 99.05  | < 10 | 2  | 8   | 13  | < 20 > 1000 | < 20 | 80  | 340  | 44   | 1.2 | < 5   | 3  | 19   | 17.1 | 111  | 0.6   | < 2   | < 0.5 | < 0.1 | 3     | 0.2   | < 0.1 | 92960  | 11.6  | 21.5 | 2.46 |      |
| K130618-C   | 14.598 | 0.337 | 0.036 | 9.93  | 99.31  | < 10 | 2  | 5   | 15  | < 20 > 1000 | 40   | 60  | 290  | 43   | 0.8 | 11    | 3  | 17   | 5.8  | 38   | 0.7   | 3     | < 0.5 | < 0.1 | < 1   | 1.5   | < 0.1 | 130700 | 6.88  | 14.1 | 1.39 |      |
| K130712-C1  | 14.508 | 0.398 | 0.036 | 10.02 | 99.36  | 10   | 3  | 6   | 16  | < 20 > 1000 | 40   | 90  | 290  | 47   | 0.9 | 8     | 3  | 11   | 20   | 39   | < 0.2 | 4     | < 0.5 | < 0.1 | < 1   | < 0.2 | < 0.1 | 129900 | 20.4  | 32.2 | 4.99 |      |
| DR150124-A2 | 0.037  | 0.004 | 0.014 | 1.33  | 100.08 | 70   | 2  | 2   | 18  | < 20        | 32   | 30  | 10   | 110  | 29  | 0.7   | 8  | 7    | 24   | 12.9 | 21    | 1.0   | < 2   | < 0.5 | < 0.1 | < 1   | < 0.2 | 0.2    | 333   | 6.24 | 15.1 | 1.19 |
| DR150124-A1 | 2.813  | 0.446 | 0.142 | 9.81  | 98.48  | 150  | 9  | 19  | 77  | 20 > 1000   | 440  | 200 | 1140 | 50   | 0.9 | 10    | 31 | 312  | 146  | 206  | 2.8   | < 2   | < 0.5 | < 0.1 | < 1   | 0.2   | 1.1   | 25190  | 11.8  | 47.5 | 3.05 |      |
| JC-7c       |        |       |       | 11.55 | 95.08  |      | 4  | 23  | 97  | < 20 > 1000 | 230  | 340 | 1300 | 43   | 1.2 | 26    | 16 | 353  | 101  | 6    | < 0.2 | 6     | < 0.5 | < 0.1 | < 1   | 0.5   | < 0.1 | 51840  | 2.95  | 8.06 | 0.74 |      |
| JC-7b       |        |       |       | 7.41  | 93.34  |      | 14 | 12  | 85  | 40 > 1000   | 190  | 370 | 950  | 43   | 1.4 | 13    | 57 | 74   | 63.8 | 50   | 3.8   | 4     | < 0.5 | < 0.1 | 2     | 0.7   | 3     | 50090  | 26    | 80.9 | 6.05 |      |
| JC-10       |        |       |       | 12.17 | 101    |      | 2  | 9   | 20  | < 20        | 146  | 260 | 70   | 1830 | 7   | 0.8   | 43 | 3    | 7    | 10.7 | 10    | 0.3   | < 2   | < 0.5 | < 0.1 | 3     | < 0.2 | 0.2    | 82    | 6.91 | 14.9 | 1.69 |
| SH-2        |        |       |       | 10.77 | 94.78  |      | 2  | 7   | 28  | 30          | 970  | 80  | 280  | 620  | 27  | < 0.5 | 35 | 4    | 35   | 104  | 5     | < 0.2 | 6     | < 0.5 | < 0.1 | 5     | 0.9   | < 0.1  | 47930 | 4.34 | 22.2 | 2.41 |



# DR File 3

## Final Report: Activation Laboratories

| Sample #    | Nd   | Sm   | Eu    | Gd   | Tb   | Dy   | Ho   | Er   | Tm    | Yb   | Lu    | Hf         | Ta          | W          | Ti        | Pb        | Bi    | Th    | U     | Co |
|-------------|------|------|-------|------|------|------|------|------|-------|------|-------|------------|-------------|------------|-----------|-----------|-------|-------|-------|----|
| AM-01       | 48.2 | 16.7 | 4.55  | 19.1 | 3.96 | 26.8 | 5.55 | 16   | 2.4   | 14.7 | 2.21  | 1.8        | 0.28        | 11.4       | 0.07      | 298 < 0.1 | 6.25  | 2.45  | 0.793 |    |
| DR150124-B  | 23.8 | 7.48 | 2.15  | 8.2  | 1.78 | 12.6 | 2.58 | 7.37 | 1.07  | 6.83 | 1.04  | 2.4        | 0.34        | 155        | 0.08      | 80 < 0.1  | 7.14  | 1.86  | 0.113 |    |
| K130712-A   | 63.5 | 28.1 | 6.97  | 27.5 | 4.06 | 21.9 | 3.34 | 8.46 | 1.15  | 7.73 | 1.18  | 1.8 < 0.01 | 53.4 < 0.05 | 14 < 0.1   | 2.04      | 8.88      | 0.108 |       |       |    |
| K130712-B   | 56   | 31.9 | 8.19  | 36.1 | 6.05 | 32   | 4.9  | 12.4 | 1.76  | 11.1 | 1.65  | 2.3        | 0.04        | 5.5 < 0.05 | 106 < 0.1 | 5.45      | 4.79  |       |       |    |
| K130712-B2  | 66.1 | 39.2 | 10.3  | 40   | 6.59 | 34.5 | 5.15 | 13.1 | 1.84  | 12.1 | 1.78  | 4.0        | 0.19        | 6.2        | 0.15      | 112 < 0.1 | 5.99  | 5.45  |       |    |
| DR150417-A  | 80.4 | 41.3 | 13.5  | 67.4 | 10.2 | 58.1 | 11.3 | 31.8 | 4.74  | 31.4 | 5.22  | 3.3 < 0.01 | 4.3 < 0.05  | < 5 < 0.1  | 0.78      | 7.23      | 0.909 |       |       |    |
| DRBYC-646   | 41   | 18   | 6.39  | 21.3 | 3.28 | 19.4 | 3.68 | 10.1 | 1.39  | 8.44 | 1.3   | 4.6 < 0.01 | 3.1 < 0.05  | 66         | 0.2       | 1.59      | 1.79  | 0.156 |       |    |
| K130618-A   | 36.9 | 20.6 | 7.48  | 26.6 | 4.41 | 27   | 5.31 | 14.9 | 2.33  | 14.8 | 2.28  | 3.8 < 0.01 | 6 < 0.05    | 14 < 0.1   | 1.29      | 5.97      | 0.205 |       |       |    |
| K130618-B   | 9.78 | 4.36 | 2.32  | 5.64 | 0.76 | 4    | 0.73 | 1.93 | 0.276 | 1.91 | 0.301 | 3.0        | 0.12        | 1.6 < 0.05 | < 5 < 0.1 | 1.15      | 1.26  | 0.157 |       |    |
| K130618-C   | 7.11 | 4.79 | 2.38  | 3.92 | 0.39 | 1.72 | 0.3  | 0.79 | 0.112 | 0.77 | 0.141 | 1.1        | 0.19        | 4.9 < 0.05 | 17 < 0.1  | 0.51      | 1.48  | 0.265 |       |    |
| K130712-C1  | 22.2 | 10.3 | 3.67  | 10.1 | 1.11 | 5.12 | 0.89 | 2.29 | 0.301 | 2.02 | 0.321 | 1.0        | 0.19        | 2.3 < 0.05 | 10 < 0.1  | 7.65      | 3.36  | 0.313 |       |    |
| DR150124-A2 | 4.69 | 0.81 | 0.196 | 0.77 | 0.18 | 1.23 | 0.32 | 0.95 | 0.152 | 0.99 | 0.155 | 0.3        | 0.09        | 0.7        | 0.06      | 14 < 0.1  | 0.91  | 0.64  |       |    |
| DR150124-A1 | 15.6 | 5.46 | 1.67  | 7.93 | 1.66 | 14   | 3.66 | 12.9 | 2.11  | 13.6 | 2.35  | 5.1        | 0.15        | 50.1       | 0.08      | 46 < 0.1  | 3.00  | 3.77  | 0.351 |    |
| JC-7c       | 3.46 | 1.19 | 0.509 | 2.4  | 0.55 | 5.43 | 1.85 | 6.94 | 1.19  | 7.96 | 1.21  | 0.4        | 0.18        | 1.2 < 0.05 | 8 < 0.1   | 0.35      | 6.04  |       |       |    |
| JC-7b       | 23.8 | 5.99 | 1.71  | 8.03 | 1.76 | 13.1 | 2.86 | 8.41 | 1.26  | 8.12 | 1.15  | 2.2        | 0.45        | 3.6 < 0.05 | 32 < 0.1  | 6.28      | 2.46  |       |       |    |
| JC-10       | 6.05 | 1.27 | 0.261 | 1.38 | 0.27 | 1.8  | 0.35 | 1.03 | 0.173 | 1.2  | 0.176 | 0.3        | 0.17 < 0.5  | 0.1        | 26 < 0.1  | 0.92      | 4.89  |       |       |    |
| SH-2        | 13.7 | 5.07 | 1.42  | 7.73 | 1.64 | 12.7 | 3.05 | 9.69 | 1.53  | 10.2 | 1.59  | 0.4        | 0.22        | 12.3       | 0.56      | 143       | 0.5   | 0.57  | 11.7  |    |

a

## PC1 vs. PC2

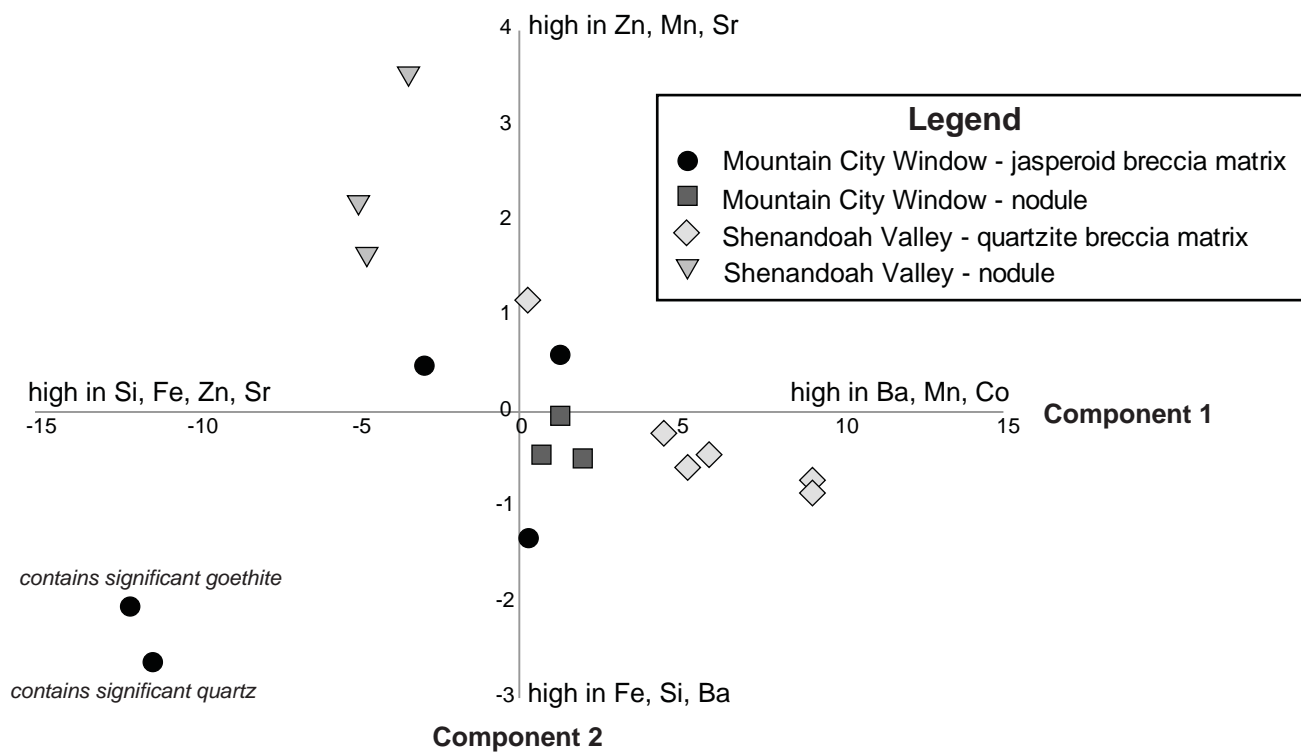

b

## Loadings Plots

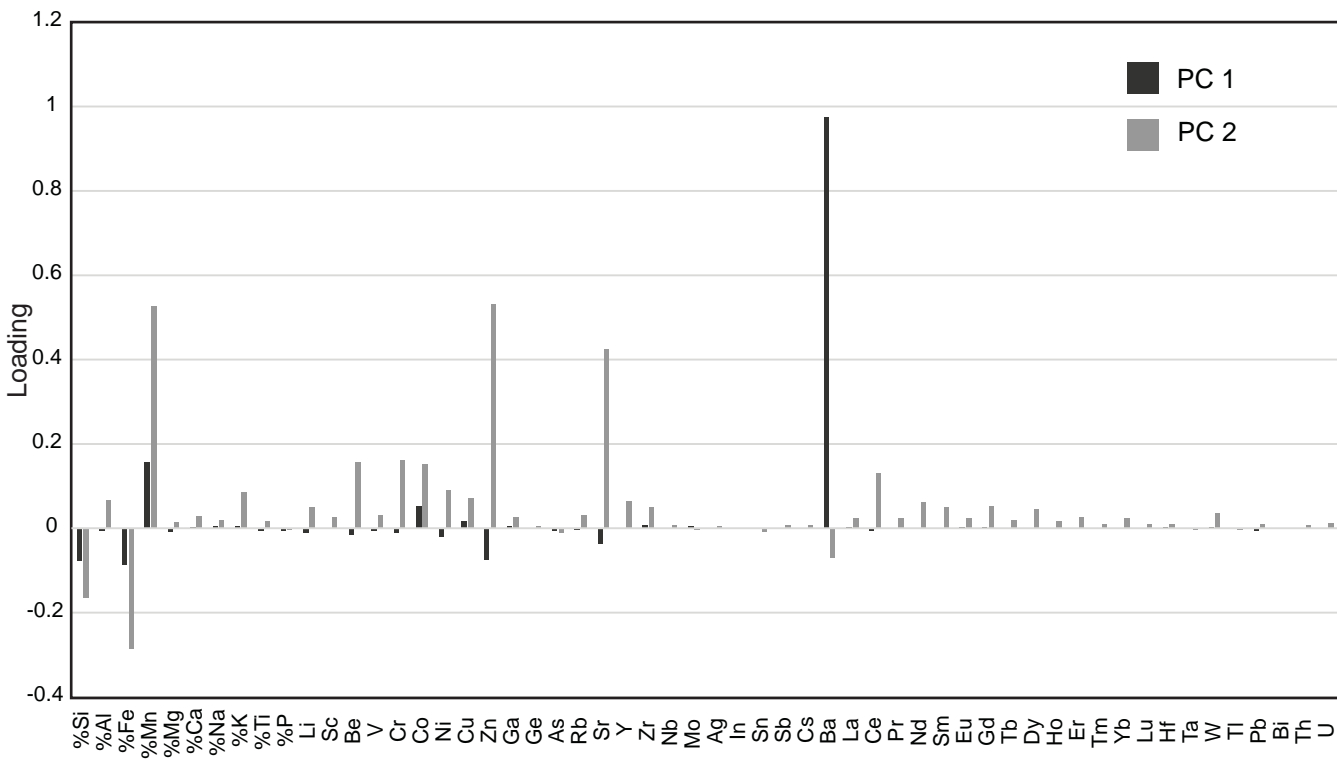

Supplement: Supplementary file 1 [file 1]
